# Supplementary material for: Determining the optimal nitrogen rate for summer maize in China by integrating agronomic, economic, and environmental aspects
Source: Copernicus journal article supplement (doi:10.5194/bg-11-3031-2014), 2014-06-11
Supplement: Supplementary file 1 [file bg-11-3031-2014-supplement.pdf]

Supplement of Biogeosciences, 11, 3031–3041, 2014  
<http://www.biogeosciences.net/bg-11-3031-2014/>  
doi:10.5194/bg-11-3031-2014-supplement  
© Author(s) 2014. CC Attribution 3.0 License.

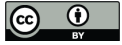

*Supplement of*

## **Determining the optimal nitrogen rate for summer maize in China by integrating agronomic, economic, and environmental aspects**

**G. L. Wang et al.**

*Correspondence to:* Z. L. Cui (cuizl@cau.edu.cn)

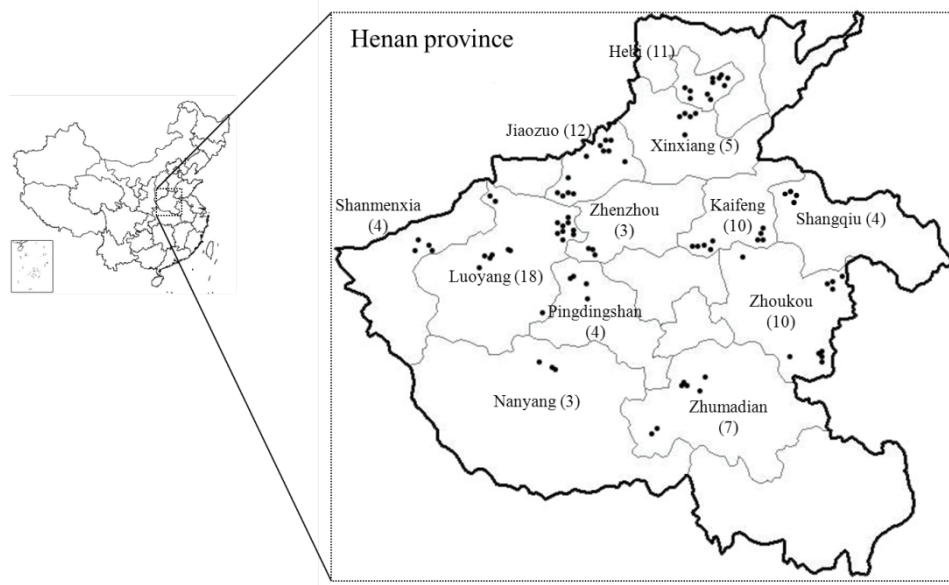

**Supplementary Fig. 1** Maize cultivation and spatial distribution of 91 experimental sites in 12 counties in Henan province for maize production in China from 2008 to 2009.

**Supplementary Table 1.** N rate, grain yield, reactive N losses from N fertilizer use (Nr losses), environment costs from N fertilizer production and use, including cost of global warming ( $C_{gw}$ ), cost of eutrophication ( $C_{eu}$ ) and cost of acidification ( $C_{acid}$ ), fertilizer cost, yield benefit, economic benefit and net benefit with different N treatment over 91 sites in 12 counties in Henan province for maize production in China from 2008 to 2009.

| County | Year | Site | Treatment | N rate (kg N/ha) | Grain yield (t/ha) | Nr losses (kg N/ha)       |            |                                |       | Environment costs (\$/ha) |          |            |       | Fertilizer N cost \$/ha | Yield benefit \$/ha | Economic benefit \$/ha | Net benefit \$/ha |
|--------|------|------|-----------|------------------|--------------------|---------------------------|------------|--------------------------------|-------|---------------------------|----------|------------|-------|-------------------------|---------------------|------------------------|-------------------|
|        |      |      |           |                  |                    | N <sub>2</sub> O emission | N leaching | NH <sub>3</sub> volatilization | Total | $C_{gw}$                  | $C_{eu}$ | $C_{acid}$ | Total |                         |                     |                        |                   |
| Hebi   | 2008 | 1    | N0        | 0                | 9.4                | 0.48                      | 4.5        | 1.3                            | 6.2   | 5                         | 1        | 2          | 9     | 0                       | 3383                | 3383                   | 3374              |
|        | 2008 | 1    | N1        | 120              | 9.8                | 0.96                      | 13.8       | 30.1                           | 44.8  | 29                        | 10       | 56         | 95    | 85                      | 3533                | 3448                   | 3353              |
|        | 2008 | 1    | N2        | 240              | 10.0               | 1.93                      | 42.6       | 58.9                           | 103.4 | 63                        | 25       | 112        | 200   | 171                     | 3602                | 3432                   | 3231              |
|        | 2008 | 1    | N3        | 360              | 9.9                | 3.87                      | 131.5      | 87.7                           | 223.1 | 108                       | 55       | 169        | 332   | 256                     | 3543                | 3287                   | 2955              |
|        | 2008 | 1    | N4        | 480              | 9.3                | 7.77                      | 218.8      | 116.5                          | 343.1 | 175                       | 85       | 225        | 485   | 341                     | 3361                | 3020                   | 2535              |
|        | 2008 | 2    | N0        | 0                | 6.5                | 0.48                      | 4.5        | 1.3                            | 6.2   | 5                         | 1        | 2          | 9     | 0                       | 2332                | 2332                   | 2322              |
|        | 2008 | 2    | N1        | 120              | 8.1                | 0.96                      | 13.8       | 30.1                           | 44.8  | 29                        | 10       | 56         | 95    | 85                      | 2895                | 2809                   | 2715              |
|        | 2008 | 2    | N2        | 240              | 8.5                | 1.93                      | 42.6       | 58.9                           | 103.4 | 63                        | 25       | 112        | 200   | 171                     | 3039                | 2868                   | 2668              |
|        | 2008 | 2    | N3        | 360              | 8.5                | 3.87                      | 131.5      | 87.7                           | 223.1 | 108                       | 55       | 169        | 332   | 256                     | 3043                | 2787                   | 2455              |
|        | 2008 | 2    | N4        | 480              | 7.6                | 7.77                      | 218.8      | 116.5                          | 343.1 | 175                       | 85       | 225        | 485   | 341                     | 2741                | 2400                   | 1914              |
|        | 2008 | 3    | N0        | 0                | 8.1                | 0.48                      | 4.5        | 1.3                            | 6.2   | 5                         | 1        | 2          | 9     | 0                       | 2905                | 2905                   | 2896              |

---

|      |   |    |     |      |      |       |       |       |     |    |     |     |     |      |      |      |
|------|---|----|-----|------|------|-------|-------|-------|-----|----|-----|-----|-----|------|------|------|
| 2008 | 3 | N1 | 120 | 8.9  | 0.96 | 13.8  | 30.1  | 44.8  | 29  | 10 | 56  | 95  | 85  | 3202 | 3116 | 3022 |
| 2008 | 3 | N2 | 240 | 9.4  | 1.93 | 42.6  | 58.9  | 103.4 | 63  | 25 | 112 | 200 | 171 | 3373 | 3203 | 3002 |
| 2008 | 3 | N3 | 360 | 9.4  | 3.87 | 131.5 | 87.7  | 223.1 | 108 | 55 | 169 | 332 | 256 | 3388 | 3132 | 2800 |
| 2008 | 3 | N4 | 480 | 9.1  | 7.77 | 218.8 | 116.5 | 343.1 | 175 | 85 | 225 | 485 | 341 | 3276 | 2935 | 2450 |
| 2008 | 4 | N0 | 0   | 9.1  | 0.48 | 4.5   | 1.3   | 6.2   | 5   | 1  | 2   | 9   | 0   | 3286 | 3286 | 3277 |
| 2008 | 4 | N1 | 120 | 10.2 | 0.96 | 13.8  | 30.1  | 44.8  | 29  | 10 | 56  | 95  | 85  | 3665 | 3580 | 3485 |
| 2008 | 4 | N2 | 240 | 10.5 | 1.93 | 42.6  | 58.9  | 103.4 | 63  | 25 | 112 | 200 | 171 | 3759 | 3589 | 3388 |
| 2008 | 4 | N3 | 360 | 10.9 | 3.87 | 131.5 | 87.7  | 223.1 | 108 | 55 | 169 | 332 | 256 | 3916 | 3661 | 3328 |
| 2008 | 4 | N4 | 480 | 10.5 | 7.77 | 218.8 | 116.5 | 343.1 | 175 | 85 | 225 | 485 | 341 | 3788 | 3447 | 2961 |
| 2009 | 5 | N0 | 0   | 6.7  | 0.48 | 4.5   | 1.3   | 6.2   | 5   | 1  | 2   | 9   | 0   | 2416 | 2416 | 2407 |
| 2009 | 5 | N1 | 120 | 7.4  | 0.96 | 13.8  | 30.1  | 44.8  | 29  | 10 | 56  | 95  | 85  | 2665 | 2580 | 2485 |
| 2009 | 5 | N2 | 240 | 8.6  | 1.93 | 42.6  | 58.9  | 103.4 | 63  | 25 | 112 | 200 | 171 | 3105 | 2935 | 2735 |
| 2009 | 5 | N3 | 360 | 8.1  | 3.87 | 131.5 | 87.7  | 223.1 | 108 | 55 | 169 | 332 | 256 | 2913 | 2657 | 2325 |
| 2009 | 5 | N4 | 480 | 8.0  | 7.77 | 218.8 | 116.5 | 343.1 | 175 | 85 | 225 | 485 | 341 | 2867 | 2526 | 2040 |
| 2009 | 6 | N0 | 0   | 8.8  | 0.48 | 4.5   | 1.3   | 6.2   | 5   | 1  | 2   | 9   | 0   | 3151 | 3151 | 3142 |
| 2009 | 6 | N1 | 120 | 9.7  | 0.96 | 13.8  | 30.1  | 44.8  | 29  | 10 | 56  | 95  | 85  | 3484 | 3399 | 3304 |
| 2009 | 6 | N2 | 240 | 10.5 | 1.93 | 42.6  | 58.9  | 103.4 | 63  | 25 | 112 | 200 | 171 | 3762 | 3592 | 3392 |
| 2009 | 6 | N3 | 360 | 10.2 | 3.87 | 131.5 | 87.7  | 223.1 | 108 | 55 | 169 | 332 | 256 | 3655 | 3399 | 3067 |
| 2009 | 6 | N4 | 480 | 9.9  | 7.77 | 218.8 | 116.5 | 343.1 | 175 | 85 | 225 | 485 | 341 | 3562 | 3221 | 2735 |
| 2009 | 7 | N0 | 0   | 8.0  | 0.48 | 4.5   | 1.3   | 6.2   | 5   | 1  | 2   | 9   | 0   | 2887 | 2887 | 2878 |
| 2009 | 7 | N1 | 120 | 9.3  | 0.96 | 13.8  | 30.1  | 44.8  | 29  | 10 | 56  | 95  | 85  | 3337 | 3252 | 3157 |

---

---

|         |    |     |      |      |       |       |       |     |    |     |     |     |      |      |      |
|---------|----|-----|------|------|-------|-------|-------|-----|----|-----|-----|-----|------|------|------|
| 2009 7  | N2 | 240 | 10.0 | 1.93 | 42.6  | 58.9  | 103.4 | 63  | 25 | 112 | 200 | 171 | 3596 | 3426 | 3226 |
| 2009 7  | N3 | 360 | 9.7  | 3.87 | 131.5 | 87.7  | 223.1 | 108 | 55 | 169 | 332 | 256 | 3500 | 3245 | 2912 |
| 2009 7  | N4 | 480 | 9.5  | 7.77 | 218.8 | 116.5 | 343.1 | 175 | 85 | 225 | 485 | 341 | 3405 | 3064 | 2578 |
| 2009 8  | N0 | 0   | 7.7  | 0.48 | 4.5   | 1.3   | 6.2   | 5   | 1  | 2   | 9   | 0   | 2772 | 2772 | 2762 |
| 2009 8  | N1 | 120 | 8.6  | 0.96 | 13.8  | 30.1  | 44.8  | 29  | 10 | 56  | 95  | 85  | 3086 | 3001 | 2906 |
| 2009 8  | N2 | 240 | 10.3 | 1.93 | 42.6  | 58.9  | 103.4 | 63  | 25 | 112 | 200 | 171 | 3711 | 3541 | 3341 |
| 2009 8  | N3 | 360 | 10.0 | 3.87 | 131.5 | 87.7  | 223.1 | 108 | 55 | 169 | 332 | 256 | 3611 | 3356 | 3023 |
| 2009 8  | N4 | 480 | 9.4  | 7.77 | 218.8 | 116.5 | 343.1 | 175 | 85 | 225 | 485 | 341 | 3372 | 3031 | 2545 |
| 2009 9  | N0 | 0   | 7.5  | 0.48 | 4.5   | 1.3   | 6.2   | 5   | 1  | 2   | 9   | 0   | 2689 | 2689 | 2680 |
| 2009 9  | N1 | 120 | 9.0  | 0.96 | 13.8  | 30.1  | 44.8  | 29  | 10 | 56  | 95  | 85  | 3249 | 3163 | 3069 |
| 2009 9  | N2 | 240 | 9.8  | 1.93 | 42.6  | 58.9  | 103.4 | 63  | 25 | 112 | 200 | 171 | 3515 | 3344 | 3144 |
| 2009 9  | N3 | 360 | 9.7  | 3.87 | 131.5 | 87.7  | 223.1 | 108 | 55 | 169 | 332 | 256 | 3496 | 3241 | 2909 |
| 2009 9  | N4 | 480 | 9.1  | 7.77 | 218.8 | 116.5 | 343.1 | 175 | 85 | 225 | 485 | 341 | 3275 | 2934 | 2449 |
| 2009 10 | N0 | 0   | 7.3  | 0.48 | 4.5   | 1.3   | 6.2   | 5   | 1  | 2   | 9   | 0   | 2636 | 2636 | 2627 |
| 2009 10 | N1 | 120 | 8.3  | 0.96 | 13.8  | 30.1  | 44.8  | 29  | 10 | 56  | 95  | 85  | 2983 | 2897 | 2802 |
| 2009 10 | N2 | 240 | 9.8  | 1.93 | 42.6  | 58.9  | 103.4 | 63  | 25 | 112 | 200 | 171 | 3515 | 3345 | 3144 |
| 2009 10 | N3 | 360 | 9.7  | 3.87 | 131.5 | 87.7  | 223.1 | 108 | 55 | 169 | 332 | 256 | 3488 | 3233 | 2901 |
| 2009 10 | N4 | 480 | 9.1  | 7.77 | 218.8 | 116.5 | 343.1 | 175 | 85 | 225 | 485 | 341 | 3289 | 2948 | 2462 |
| 2009 11 | N0 | 0   | 7.1  | 0.48 | 4.5   | 1.3   | 6.2   | 5   | 1  | 2   | 9   | 0   | 2564 | 2564 | 2555 |
| 2009 11 | N1 | 120 | 9.2  | 0.96 | 13.8  | 30.1  | 44.8  | 29  | 10 | 56  | 95  | 85  | 3310 | 3225 | 3130 |
| 2009 11 | N2 | 240 | 9.3  | 1.93 | 42.6  | 58.9  | 103.4 | 63  | 25 | 112 | 200 | 171 | 3358 | 3187 | 2987 |

---

|         |      |    |    |     |      |      |       |       |       |     |    |     |     |     |      |      |      |
|---------|------|----|----|-----|------|------|-------|-------|-------|-----|----|-----|-----|-----|------|------|------|
|         | 2009 | 11 | N3 | 360 | 9.1  | 3.87 | 131.5 | 87.7  | 223.1 | 108 | 55 | 169 | 332 | 256 | 3283 | 3028 | 2695 |
|         | 2009 | 11 | N4 | 480 | 8.9  | 7.77 | 218.8 | 116.5 | 343.1 | 175 | 85 | 225 | 485 | 341 | 3198 | 2857 | 2372 |
| Jiaozuo | 2008 | 1  | N0 | 0   | 9.3  | 0.48 | 4.5   | 1.3   | 6.2   | 5   | 1  | 2   | 9   | 0   | 3347 | 3347 | 3338 |
|         | 2008 | 1  | N1 | 120 | 9.7  | 0.96 | 13.8  | 30.1  | 44.8  | 29  | 10 | 56  | 95  | 85  | 3491 | 3406 | 3311 |
|         | 2008 | 1  | N2 | 240 | 10.2 | 1.93 | 42.6  | 58.9  | 103.4 | 63  | 25 | 112 | 200 | 171 | 3650 | 3479 | 3279 |
|         | 2008 | 1  | N3 | 360 | 9.4  | 3.87 | 131.5 | 87.7  | 223.1 | 108 | 55 | 169 | 332 | 256 | 3361 | 3106 | 2773 |
|         | 2008 | 1  | N4 | 480 | 8.8  | 7.77 | 218.8 | 116.5 | 343.1 | 175 | 85 | 225 | 485 | 341 | 3175 | 2834 | 2349 |
|         | 2008 | 2  | N0 | 0   | 9.7  | 0.48 | 4.5   | 1.3   | 6.2   | 5   | 1  | 2   | 9   | 0   | 3484 | 3484 | 3475 |
|         | 2008 | 2  | N1 | 120 | 10.5 | 0.96 | 13.8  | 30.1  | 44.8  | 29  | 10 | 56  | 95  | 85  | 3771 | 3686 | 3591 |
|         | 2008 | 2  | N2 | 240 | 11.2 | 1.93 | 42.6  | 58.9  | 103.4 | 63  | 25 | 112 | 200 | 171 | 4017 | 3846 | 3646 |
|         | 2008 | 2  | N3 | 360 | 10.8 | 3.87 | 131.5 | 87.7  | 223.1 | 108 | 55 | 169 | 332 | 256 | 3887 | 3631 | 3299 |
|         | 2008 | 2  | N4 | 480 | 10.6 | 7.77 | 218.8 | 116.5 | 343.1 | 175 | 85 | 225 | 485 | 341 | 3796 | 3455 | 2970 |
|         | 2008 | 3  | N0 | 0   | 8.0  | 0.48 | 4.5   | 1.3   | 6.2   | 5   | 1  | 2   | 9   | 0   | 2891 | 2891 | 2882 |
|         | 2008 | 3  | N1 | 120 | 10.4 | 0.96 | 13.8  | 30.1  | 44.8  | 29  | 10 | 56  | 95  | 85  | 3732 | 3647 | 3552 |
|         | 2008 | 3  | N2 | 240 | 10.9 | 1.93 | 42.6  | 58.9  | 103.4 | 63  | 25 | 112 | 200 | 171 | 3920 | 3750 | 3549 |
|         | 2008 | 3  | N3 | 360 | 11.4 | 3.87 | 131.5 | 87.7  | 223.1 | 108 | 55 | 169 | 332 | 256 | 4101 | 3845 | 3513 |
|         | 2008 | 3  | N4 | 480 | 9.5  | 7.77 | 218.8 | 116.5 | 343.1 | 175 | 85 | 225 | 485 | 341 | 3399 | 3058 | 2572 |
|         | 2008 | 4  | N0 | 0   | 10.8 | 0.48 | 4.5   | 1.3   | 6.2   | 5   | 1  | 2   | 9   | 0   | 3887 | 3887 | 3877 |
|         | 2008 | 4  | N1 | 105 | 11.5 | 0.88 | 12.0  | 26.5  | 39.3  | 25  | 8  | 49  | 83  | 75  | 4150 | 4076 | 3993 |
|         | 2008 | 4  | N2 | 210 | 11.9 | 1.62 | 32.1  | 51.7  | 85.4  | 54  | 20 | 98  | 172 | 149 | 4278 | 4129 | 3957 |
|         | 2008 | 4  | N3 | 315 | 11.9 | 2.98 | 86.2  | 76.9  | 166.0 | 90  | 41 | 147 | 278 | 224 | 4294 | 4070 | 3792 |

---

|      |   |    |     |      |      |       |       |       |     |    |     |     |     |      |      |      |
|------|---|----|-----|------|------|-------|-------|-------|-----|----|-----|-----|-----|------|------|------|
| 2008 | 4 | N4 | 420 | 11.3 | 5.49 | 163.5 | 102.1 | 271.0 | 138 | 67 | 197 | 402 | 298 | 4058 | 3760 | 3358 |
| 2008 | 5 | N0 | 0   | 8.1  | 0.48 | 4.5   | 1.3   | 6.2   | 5   | 1  | 2   | 9   | 0   | 2924 | 2924 | 2915 |
| 2008 | 5 | N1 | 105 | 9.1  | 0.88 | 12.0  | 26.5  | 39.3  | 25  | 8  | 49  | 83  | 75  | 3287 | 3213 | 3130 |
| 2008 | 5 | N2 | 210 | 9.8  | 1.62 | 32.1  | 51.7  | 85.4  | 54  | 20 | 98  | 172 | 149 | 3515 | 3366 | 3194 |
| 2008 | 5 | N3 | 315 | 10.4 | 2.98 | 86.2  | 76.9  | 166.0 | 90  | 41 | 147 | 278 | 224 | 3727 | 3503 | 3225 |
| 2008 | 5 | N4 | 420 | 9.4  | 5.49 | 163.5 | 102.1 | 271.0 | 138 | 67 | 197 | 402 | 298 | 3371 | 3073 | 2671 |
| 2008 | 6 | N0 | 0   | 7.7  | 0.48 | 4.5   | 1.3   | 6.2   | 5   | 1  | 2   | 9   | 0   | 2784 | 2784 | 2775 |
| 2008 | 6 | N1 | 105 | 9.4  | 0.88 | 12.0  | 26.5  | 39.3  | 25  | 8  | 49  | 83  | 75  | 3367 | 3293 | 3210 |
| 2008 | 6 | N2 | 210 | 9.9  | 1.62 | 32.1  | 51.7  | 85.4  | 54  | 20 | 98  | 172 | 149 | 3563 | 3414 | 3242 |
| 2008 | 6 | N3 | 315 | 10.2 | 2.98 | 86.2  | 76.9  | 166.0 | 90  | 41 | 147 | 278 | 224 | 3683 | 3459 | 3182 |
| 2008 | 6 | N4 | 420 | 9.6  | 5.49 | 163.5 | 102.1 | 271.0 | 138 | 67 | 197 | 402 | 298 | 3447 | 3149 | 2747 |
| 2009 | 7 | N0 | 0   | 7.8  | 0.48 | 4.5   | 1.3   | 6.2   | 5   | 1  | 2   | 9   | 0   | 2804 | 2804 | 2795 |
| 2009 | 7 | N1 | 120 | 8.4  | 0.96 | 13.8  | 30.1  | 44.8  | 29  | 10 | 56  | 95  | 85  | 3025 | 2940 | 2845 |
| 2009 | 7 | N2 | 240 | 9.0  | 1.93 | 42.6  | 58.9  | 103.4 | 63  | 25 | 112 | 200 | 171 | 3225 | 3054 | 2854 |
| 2009 | 7 | N3 | 360 | 8.3  | 3.87 | 131.5 | 87.7  | 223.1 | 108 | 55 | 169 | 332 | 256 | 2979 | 2724 | 2391 |
| 2009 | 7 | N4 | 480 | 8.2  | 7.77 | 218.8 | 116.5 | 343.1 | 175 | 85 | 225 | 485 | 341 | 2952 | 2611 | 2125 |
| 2009 | 8 | N0 | 0   | 8.3  | 0.48 | 4.5   | 1.3   | 6.2   | 5   | 1  | 2   | 9   | 0   | 2966 | 2966 | 2957 |
| 2009 | 8 | N1 | 120 | 9.1  | 0.96 | 13.8  | 30.1  | 44.8  | 29  | 10 | 56  | 95  | 85  | 3288 | 3203 | 3108 |
| 2009 | 8 | N2 | 240 | 8.6  | 1.93 | 42.6  | 58.9  | 103.4 | 63  | 25 | 112 | 200 | 171 | 3088 | 2917 | 2717 |
| 2009 | 8 | N3 | 360 | 8.4  | 3.87 | 131.5 | 87.7  | 223.1 | 108 | 55 | 169 | 332 | 256 | 3004 | 2748 | 2416 |
| 2009 | 8 | N4 | 480 | 7.9  | 7.77 | 218.8 | 116.5 | 343.1 | 175 | 85 | 225 | 485 | 341 | 2850 | 2509 | 2023 |

---

|         |      |    |    |     |     |      |       |       |       |     |    |     |     |     |      |      |      |
|---------|------|----|----|-----|-----|------|-------|-------|-------|-----|----|-----|-----|-----|------|------|------|
|         | 2009 | 9  | N0 | 0   | 8.5 | 0.48 | 4.5   | 1.3   | 6.2   | 5   | 1  | 2   | 9   | 0   | 3060 | 3060 | 3051 |
|         | 2009 | 9  | N1 | 120 | 9.9 | 0.96 | 13.8  | 30.1  | 44.8  | 29  | 10 | 56  | 95  | 85  | 3553 | 3467 | 3373 |
|         | 2009 | 9  | N2 | 240 | 9.1 | 1.93 | 42.6  | 58.9  | 103.4 | 63  | 25 | 112 | 200 | 171 | 3273 | 3103 | 2903 |
|         | 2009 | 9  | N3 | 360 | 8.8 | 3.87 | 131.5 | 87.7  | 223.1 | 108 | 55 | 169 | 332 | 256 | 3154 | 2899 | 2567 |
|         | 2009 | 9  | N4 | 480 | 8.3 | 7.77 | 218.8 | 116.5 | 343.1 | 175 | 85 | 225 | 485 | 341 | 2991 | 2650 | 2164 |
|         | 2009 | 10 | N0 | 0   | 7.1 | 0.48 | 4.5   | 1.3   | 6.2   | 5   | 1  | 2   | 9   | 0   | 2564 | 2564 | 2555 |
|         | 2009 | 10 | N1 | 120 | 8.8 | 0.96 | 13.8  | 30.1  | 44.8  | 29  | 10 | 56  | 95  | 85  | 3169 | 3084 | 2989 |
|         | 2009 | 10 | N2 | 240 | 8.6 | 1.93 | 42.6  | 58.9  | 103.4 | 63  | 25 | 112 | 200 | 171 | 3106 | 2936 | 2735 |
|         | 2009 | 10 | N3 | 360 | 8.0 | 3.87 | 131.5 | 87.7  | 223.1 | 108 | 55 | 169 | 332 | 256 | 2859 | 2603 | 2271 |
|         | 2009 | 10 | N4 | 480 | 7.6 | 7.77 | 218.8 | 116.5 | 343.1 | 175 | 85 | 225 | 485 | 341 | 2749 | 2408 | 1923 |
|         | 2009 | 11 | N0 | 0   | 3.2 | 0.48 | 4.5   | 1.3   | 6.2   | 5   | 1  | 2   | 9   | 0   | 1151 | 1151 | 1142 |
|         | 2009 | 11 | N1 | 105 | 4.9 | 0.88 | 12.0  | 26.5  | 39.3  | 25  | 8  | 49  | 83  | 75  | 1753 | 1678 | 1595 |
|         | 2009 | 11 | N2 | 210 | 6.3 | 1.62 | 32.1  | 51.7  | 85.4  | 54  | 20 | 98  | 172 | 149 | 2262 | 2113 | 1941 |
|         | 2009 | 11 | N3 | 315 | 5.2 | 2.98 | 86.2  | 76.9  | 166.0 | 90  | 41 | 147 | 278 | 224 | 1867 | 1643 | 1365 |
|         | 2009 | 11 | N4 | 420 | 4.8 | 5.49 | 163.5 | 102.1 | 271.0 | 138 | 67 | 197 | 402 | 298 | 1734 | 1436 | 1034 |
|         | 2009 | 12 | N0 | 0   | 3.4 | 0.48 | 4.5   | 1.3   | 6.2   | 5   | 1  | 2   | 9   | 0   | 1212 | 1212 | 1203 |
|         | 2009 | 12 | N1 | 105 | 5.3 | 0.88 | 12.0  | 26.5  | 39.3  | 25  | 8  | 49  | 83  | 75  | 1894 | 1819 | 1736 |
|         | 2009 | 12 | N2 | 210 | 6.9 | 1.62 | 32.1  | 51.7  | 85.4  | 54  | 20 | 98  | 172 | 149 | 2491 | 2341 | 2169 |
|         | 2009 | 12 | N3 | 315 | 6.3 | 2.98 | 86.2  | 76.9  | 166.0 | 90  | 41 | 147 | 278 | 224 | 2278 | 2055 | 1777 |
|         | 2009 | 12 | N4 | 420 | 5.1 | 5.49 | 163.5 | 102.1 | 271.0 | 138 | 67 | 197 | 402 | 298 | 1834 | 1536 | 1134 |
| Kaifeng | 2008 | 1  | N0 | 0   | 6.0 | 0.48 | 4.5   | 1.3   | 6.2   | 5   | 1  | 2   | 9   | 0   | 2158 | 2158 | 2149 |



---

|      |   |    |     |     |      |       |       |       |     |    |     |     |     |      |      |      |
|------|---|----|-----|-----|------|-------|-------|-------|-----|----|-----|-----|-----|------|------|------|
| 2008 | 1 | N1 | 120 | 7.1 | 0.96 | 13.8  | 30.1  | 44.8  | 29  | 10 | 56  | 95  | 85  | 2553 | 2468 | 2373 |
| 2008 | 1 | N2 | 240 | 9.6 | 1.93 | 42.6  | 58.9  | 103.4 | 63  | 25 | 112 | 200 | 171 | 3453 | 3282 | 3082 |
| 2008 | 1 | N3 | 360 | 8.7 | 3.87 | 131.5 | 87.7  | 223.1 | 108 | 55 | 169 | 332 | 256 | 3131 | 2875 | 2543 |
| 2008 | 1 | N4 | 480 | 7.9 | 7.77 | 218.8 | 116.5 | 343.1 | 175 | 85 | 225 | 485 | 341 | 2846 | 2505 | 2019 |
| 2008 | 2 | N0 | 0   | 7.9 | 0.48 | 4.5   | 1.3   | 6.2   | 5   | 1  | 2   | 9   | 0   | 2858 | 2858 | 2848 |
| 2008 | 2 | N1 | 120 | 9.4 | 0.96 | 13.8  | 30.1  | 44.8  | 29  | 10 | 56  | 95  | 85  | 3381 | 3295 | 3201 |
| 2008 | 2 | N2 | 240 | 9.5 | 1.93 | 42.6  | 58.9  | 103.4 | 63  | 25 | 112 | 200 | 171 | 3412 | 3242 | 3041 |
| 2008 | 2 | N3 | 360 | 8.8 | 3.87 | 131.5 | 87.7  | 223.1 | 108 | 55 | 169 | 332 | 256 | 3181 | 2925 | 2593 |
| 2008 | 2 | N4 | 480 | 8.8 | 7.77 | 218.8 | 116.5 | 343.1 | 175 | 85 | 225 | 485 | 341 | 3160 | 2819 | 2333 |
| 2008 | 3 | N0 | 0   | 6.4 | 0.48 | 4.5   | 1.3   | 6.2   | 5   | 1  | 2   | 9   | 0   | 2312 | 2312 | 2303 |
| 2008 | 3 | N1 | 120 | 8.1 | 0.96 | 13.8  | 30.1  | 44.8  | 29  | 10 | 56  | 95  | 85  | 2904 | 2819 | 2724 |
| 2008 | 3 | N2 | 240 | 8.4 | 1.93 | 42.6  | 58.9  | 103.4 | 63  | 25 | 112 | 200 | 171 | 3033 | 2862 | 2662 |
| 2008 | 3 | N3 | 360 | 8.4 | 3.87 | 131.5 | 87.7  | 223.1 | 108 | 55 | 169 | 332 | 256 | 3020 | 2765 | 2432 |
| 2008 | 3 | N4 | 480 | 8.0 | 7.77 | 218.8 | 116.5 | 343.1 | 175 | 85 | 225 | 485 | 341 | 2880 | 2539 | 2054 |
| 2008 | 4 | N0 | 0   | 7.7 | 0.48 | 4.5   | 1.3   | 6.2   | 5   | 1  | 2   | 9   | 0   | 2767 | 2767 | 2758 |
| 2008 | 4 | N1 | 120 | 8.5 | 0.96 | 13.8  | 30.1  | 44.8  | 29  | 10 | 56  | 95  | 85  | 3043 | 2958 | 2863 |
| 2008 | 4 | N2 | 240 | 9.2 | 1.93 | 42.6  | 58.9  | 103.4 | 63  | 25 | 112 | 200 | 171 | 3303 | 3132 | 2932 |
| 2008 | 4 | N3 | 360 | 8.8 | 3.87 | 131.5 | 87.7  | 223.1 | 108 | 55 | 169 | 332 | 256 | 3145 | 2890 | 2558 |
| 2008 | 4 | N4 | 480 | 8.5 | 7.77 | 218.8 | 116.5 | 343.1 | 175 | 85 | 225 | 485 | 341 | 3064 | 2723 | 2238 |
| 2008 | 5 | N0 | 0   | 7.0 | 0.48 | 4.5   | 1.3   | 6.2   | 5   | 1  | 2   | 9   | 0   | 2516 | 2516 | 2507 |
| 2008 | 5 | N1 | 105 | 7.4 | 0.88 | 12.0  | 26.5  | 39.3  | 25  | 8  | 49  | 83  | 75  | 2667 | 2592 | 2509 |

---

---

|      |   |    |     |     |      |       |       |       |     |    |     |     |     |      |      |      |
|------|---|----|-----|-----|------|-------|-------|-------|-----|----|-----|-----|-----|------|------|------|
| 2008 | 5 | N2 | 210 | 8.3 | 1.62 | 32.1  | 51.7  | 85.4  | 54  | 20 | 98  | 172 | 149 | 2974 | 2825 | 2652 |
| 2008 | 5 | N3 | 315 | 7.7 | 2.98 | 86.2  | 76.9  | 166.0 | 90  | 41 | 147 | 278 | 224 | 2765 | 2541 | 2263 |
| 2008 | 5 | N4 | 420 | 7.6 | 5.49 | 163.5 | 102.1 | 271.0 | 138 | 67 | 197 | 402 | 298 | 2728 | 2430 | 2028 |
| 2008 | 6 | N0 | 0   | 7.3 | 0.48 | 4.5   | 1.3   | 6.2   | 5   | 1  | 2   | 9   | 0   | 2630 | 2630 | 2620 |
| 2008 | 6 | N1 | 105 | 7.9 | 0.88 | 12.0  | 26.5  | 39.3  | 25  | 8  | 49  | 83  | 75  | 2856 | 2781 | 2698 |
| 2008 | 6 | N2 | 210 | 8.6 | 1.62 | 32.1  | 51.7  | 85.4  | 54  | 20 | 98  | 172 | 149 | 3081 | 2932 | 2759 |
| 2008 | 6 | N3 | 315 | 8.0 | 2.98 | 86.2  | 76.9  | 166.0 | 90  | 41 | 147 | 278 | 224 | 2885 | 2661 | 2383 |
| 2008 | 6 | N4 | 420 | 7.5 | 5.49 | 163.5 | 102.1 | 271.0 | 138 | 67 | 197 | 402 | 298 | 2707 | 2409 | 2007 |
| 2008 | 7 | N0 | 0   | 5.8 | 0.48 | 4.5   | 1.3   | 6.2   | 5   | 1  | 2   | 9   | 0   | 2075 | 2075 | 2066 |
| 2008 | 7 | N1 | 105 | 6.5 | 0.88 | 12.0  | 26.5  | 39.3  | 25  | 8  | 49  | 83  | 75  | 2332 | 2258 | 2175 |
| 2008 | 7 | N2 | 210 | 7.8 | 1.62 | 32.1  | 51.7  | 85.4  | 54  | 20 | 98  | 172 | 149 | 2791 | 2642 | 2469 |
| 2008 | 7 | N3 | 315 | 7.7 | 2.98 | 86.2  | 76.9  | 166.0 | 90  | 41 | 147 | 278 | 224 | 2764 | 2540 | 2262 |
| 2008 | 7 | N4 | 420 | 7.2 | 5.49 | 163.5 | 102.1 | 271.0 | 138 | 67 | 197 | 402 | 298 | 2598 | 2300 | 1898 |
| 2009 | 8 | N0 | 0   | 8.4 | 0.48 | 4.5   | 1.3   | 6.2   | 5   | 1  | 2   | 9   | 0   | 3027 | 3027 | 3018 |
| 2009 | 8 | N1 | 105 | 9.4 | 0.88 | 12.0  | 26.5  | 39.3  | 25  | 8  | 49  | 83  | 75  | 3377 | 3302 | 3220 |
| 2009 | 8 | N2 | 210 | 9.0 | 1.62 | 32.1  | 51.7  | 85.4  | 54  | 20 | 98  | 172 | 149 | 3236 | 3086 | 2914 |
| 2009 | 8 | N3 | 315 | 8.9 | 2.98 | 86.2  | 76.9  | 166.0 | 90  | 41 | 147 | 278 | 224 | 3199 | 2976 | 2698 |
| 2009 | 8 | N4 | 420 | 8.8 | 5.49 | 163.5 | 102.1 | 271.0 | 138 | 67 | 197 | 402 | 298 | 3170 | 2871 | 2469 |
| 2009 | 9 | N0 | 0   | 5.4 | 0.48 | 4.5   | 1.3   | 6.2   | 5   | 1  | 2   | 9   | 0   | 1943 | 1943 | 1934 |
| 2009 | 9 | N1 | 105 | 6.6 | 0.88 | 12.0  | 26.5  | 39.3  | 25  | 8  | 49  | 83  | 75  | 2363 | 2289 | 2206 |
| 2009 | 9 | N2 | 210 | 7.2 | 1.62 | 32.1  | 51.7  | 85.4  | 54  | 20 | 98  | 172 | 149 | 2570 | 2421 | 2249 |

---

|         |         |    |     |     |      |       |       |       |     |    |     |     |     |      |      |      |
|---------|---------|----|-----|-----|------|-------|-------|-------|-----|----|-----|-----|-----|------|------|------|
|         | 2009 9  | N3 | 315 | 6.2 | 2.98 | 86.2  | 76.9  | 166.0 | 90  | 41 | 147 | 278 | 224 | 2220 | 1996 | 1718 |
|         | 2009 9  | N4 | 420 | 6.5 | 5.49 | 163.5 | 102.1 | 271.0 | 138 | 67 | 197 | 402 | 298 | 2340 | 2041 | 1640 |
|         | 2009 10 | N0 | 0   | 8.2 | 0.48 | 4.5   | 1.3   | 6.2   | 5   | 1  | 2   | 9   | 0   | 2939 | 2939 | 2930 |
|         | 2009 10 | N1 | 105 | 9.0 | 0.88 | 12.0  | 26.5  | 39.3  | 25  | 8  | 49  | 83  | 75  | 3227 | 3152 | 3069 |
|         | 2009 10 | N2 | 210 | 9.7 | 1.62 | 32.1  | 51.7  | 85.4  | 54  | 20 | 98  | 172 | 149 | 3472 | 3323 | 3151 |
|         | 2009 10 | N3 | 315 | 9.0 | 2.98 | 86.2  | 76.9  | 166.0 | 90  | 41 | 147 | 278 | 224 | 3234 | 3010 | 2733 |
|         | 2009 10 | N4 | 420 | 8.9 | 5.49 | 163.5 | 102.1 | 271.0 | 138 | 67 | 197 | 402 | 298 | 3184 | 2886 | 2484 |
| Luoyang | 2008 1  | N0 | 0   | 7.5 | 0.48 | 4.5   | 1.3   | 6.2   | 5   | 1  | 2   | 9   | 0   | 2687 | 2687 | 2678 |
|         | 2008 1  | N1 | 120 | 8.8 | 0.96 | 13.8  | 30.1  | 44.8  | 29  | 10 | 56  | 95  | 85  | 3154 | 3069 | 2974 |
|         | 2008 1  | N2 | 240 | 9.7 | 1.93 | 42.6  | 58.9  | 103.4 | 63  | 25 | 112 | 200 | 171 | 3469 | 3298 | 3098 |
|         | 2008 1  | N3 | 360 | 9.6 | 3.87 | 131.5 | 87.7  | 223.1 | 108 | 55 | 169 | 332 | 256 | 3445 | 3189 | 2857 |
|         | 2008 1  | N4 | 480 | 9.4 | 7.77 | 218.8 | 116.5 | 343.1 | 175 | 85 | 225 | 485 | 341 | 3395 | 3054 | 2569 |
|         | 2008 2  | N0 | 0   | 6.7 | 0.48 | 4.5   | 1.3   | 6.2   | 5   | 1  | 2   | 9   | 0   | 2396 | 2396 | 2387 |
|         | 2008 2  | N1 | 120 | 7.5 | 0.96 | 13.8  | 30.1  | 44.8  | 29  | 10 | 56  | 95  | 85  | 2711 | 2626 | 2531 |
|         | 2008 2  | N2 | 240 | 8.4 | 1.93 | 42.6  | 58.9  | 103.4 | 63  | 25 | 112 | 200 | 171 | 3023 | 2852 | 2652 |
|         | 2008 2  | N3 | 360 | 8.3 | 3.87 | 131.5 | 87.7  | 223.1 | 108 | 55 | 169 | 332 | 256 | 2993 | 2737 | 2405 |
|         | 2008 2  | N4 | 480 | 8.0 | 7.77 | 218.8 | 116.5 | 343.1 | 175 | 85 | 225 | 485 | 341 | 2888 | 2547 | 2061 |
|         | 2008 3  | N0 | 0   | 6.9 | 0.48 | 4.5   | 1.3   | 6.2   | 5   | 1  | 2   | 9   | 0   | 2489 | 2489 | 2480 |
|         | 2008 3  | N1 | 120 | 7.9 | 0.96 | 13.8  | 30.1  | 44.8  | 29  | 10 | 56  | 95  | 85  | 2828 | 2743 | 2648 |
|         | 2008 3  | N2 | 240 | 8.8 | 1.93 | 42.6  | 58.9  | 103.4 | 63  | 25 | 112 | 200 | 171 | 3166 | 2996 | 2796 |
|         | 2008 3  | N3 | 360 | 8.7 | 3.87 | 131.5 | 87.7  | 223.1 | 108 | 55 | 169 | 332 | 256 | 3115 | 2859 | 2527 |

---

|      |   |    |     |      |      |       |       |       |     |    |     |     |     |      |      |      |
|------|---|----|-----|------|------|-------|-------|-------|-----|----|-----|-----|-----|------|------|------|
| 2008 | 3 | N4 | 480 | 8.4  | 7.77 | 218.8 | 116.5 | 343.1 | 175 | 85 | 225 | 485 | 341 | 3008 | 2667 | 2181 |
| 2008 | 4 | N0 | 0   | 7.6  | 0.48 | 4.5   | 1.3   | 6.2   | 5   | 1  | 2   | 9   | 0   | 2720 | 2720 | 2711 |
| 2008 | 4 | N1 | 120 | 8.8  | 0.96 | 13.8  | 30.1  | 44.8  | 29  | 10 | 56  | 95  | 85  | 3145 | 3060 | 2965 |
| 2008 | 4 | N2 | 240 | 9.8  | 1.93 | 42.6  | 58.9  | 103.4 | 63  | 25 | 112 | 200 | 171 | 3520 | 3349 | 3149 |
| 2008 | 4 | N3 | 360 | 10.1 | 3.87 | 131.5 | 87.7  | 223.1 | 108 | 55 | 169 | 332 | 256 | 3619 | 3363 | 3031 |
| 2008 | 4 | N4 | 480 | 9.5  | 7.77 | 218.8 | 116.5 | 343.1 | 175 | 85 | 225 | 485 | 341 | 3427 | 3086 | 2601 |
| 2008 | 5 | N0 | 0   | 5.2  | 0.48 | 4.5   | 1.3   | 6.2   | 5   | 1  | 2   | 9   | 0   | 1857 | 1857 | 1848 |
| 2008 | 5 | N1 | 120 | 6.1  | 0.96 | 13.8  | 30.1  | 44.8  | 29  | 10 | 56  | 95  | 85  | 2211 | 2125 | 2031 |
| 2008 | 5 | N2 | 240 | 6.7  | 1.93 | 42.6  | 58.9  | 103.4 | 63  | 25 | 112 | 200 | 171 | 2414 | 2244 | 2044 |
| 2008 | 5 | N3 | 360 | 6.5  | 3.87 | 131.5 | 87.7  | 223.1 | 108 | 55 | 169 | 332 | 256 | 2346 | 2090 | 1758 |
| 2008 | 5 | N4 | 480 | 6.3  | 7.77 | 218.8 | 116.5 | 343.1 | 175 | 85 | 225 | 485 | 341 | 2280 | 1939 | 1453 |
| 2009 | 6 | N0 | 0   | 6.8  | 0.48 | 4.5   | 1.3   | 6.2   | 5   | 1  | 2   | 9   | 0   | 2451 | 2451 | 2441 |
| 2009 | 6 | N1 | 120 | 7.3  | 0.96 | 13.8  | 30.1  | 44.8  | 29  | 10 | 56  | 95  | 85  | 2640 | 2555 | 2460 |
| 2009 | 6 | N2 | 240 | 8.5  | 1.93 | 42.6  | 58.9  | 103.4 | 63  | 25 | 112 | 200 | 171 | 3042 | 2872 | 2672 |
| 2009 | 6 | N3 | 360 | 8.0  | 3.87 | 131.5 | 87.7  | 223.1 | 108 | 55 | 169 | 332 | 256 | 2867 | 2611 | 2279 |
| 2009 | 6 | N4 | 480 | 7.6  | 7.77 | 218.8 | 116.5 | 343.1 | 175 | 85 | 225 | 485 | 341 | 2748 | 2407 | 1922 |
| 2009 | 7 | N0 | 0   | 5.5  | 0.48 | 4.5   | 1.3   | 6.2   | 5   | 1  | 2   | 9   | 0   | 1983 | 1983 | 1974 |
| 2009 | 7 | N1 | 120 | 6.3  | 0.96 | 13.8  | 30.1  | 44.8  | 29  | 10 | 56  | 95  | 85  | 2252 | 2167 | 2072 |
| 2009 | 7 | N2 | 240 | 6.7  | 1.93 | 42.6  | 58.9  | 103.4 | 63  | 25 | 112 | 200 | 171 | 2406 | 2236 | 2035 |
| 2009 | 7 | N3 | 360 | 6.3  | 3.87 | 131.5 | 87.7  | 223.1 | 108 | 55 | 169 | 332 | 256 | 2279 | 2023 | 1691 |
| 2009 | 7 | N4 | 480 | 6.2  | 7.77 | 218.8 | 116.5 | 343.1 | 175 | 85 | 225 | 485 | 341 | 2221 | 1880 | 1395 |

---

---

|         |    |     |     |      |       |       |       |     |    |     |     |     |      |      |      |
|---------|----|-----|-----|------|-------|-------|-------|-----|----|-----|-----|-----|------|------|------|
| 2009 8  | N0 | 0   | 4.6 | 0.48 | 4.5   | 1.3   | 6.2   | 5   | 1  | 2   | 9   | 0   | 1645 | 1645 | 1636 |
| 2009 8  | N1 | 120 | 6.1 | 0.96 | 13.8  | 30.1  | 44.8  | 29  | 10 | 56  | 95  | 85  | 2185 | 2099 | 2005 |
| 2009 8  | N2 | 240 | 6.2 | 1.93 | 42.6  | 58.9  | 103.4 | 63  | 25 | 112 | 200 | 171 | 2212 | 2042 | 1841 |
| 2009 8  | N3 | 360 | 6.1 | 3.87 | 131.5 | 87.7  | 223.1 | 108 | 55 | 169 | 332 | 256 | 2203 | 1947 | 1615 |
| 2009 8  | N4 | 480 | 6.0 | 7.77 | 218.8 | 116.5 | 343.1 | 175 | 85 | 225 | 485 | 341 | 2144 | 1803 | 1317 |
| 2009 9  | N0 | 0   | 7.0 | 0.48 | 4.5   | 1.3   | 6.2   | 5   | 1  | 2   | 9   | 0   | 2534 | 2534 | 2525 |
| 2009 9  | N1 | 120 | 8.1 | 0.96 | 13.8  | 30.1  | 44.8  | 29  | 10 | 56  | 95  | 85  | 2897 | 2811 | 2717 |
| 2009 9  | N2 | 240 | 8.8 | 1.93 | 42.6  | 58.9  | 103.4 | 63  | 25 | 112 | 200 | 171 | 3157 | 2987 | 2787 |
| 2009 9  | N3 | 360 | 8.4 | 3.87 | 131.5 | 87.7  | 223.1 | 108 | 55 | 169 | 332 | 256 | 3004 | 2748 | 2416 |
| 2009 9  | N4 | 480 | 7.9 | 7.77 | 218.8 | 116.5 | 343.1 | 175 | 85 | 225 | 485 | 341 | 2846 | 2505 | 2020 |
| 2009 10 | N0 | 0   | 6.9 | 0.48 | 4.5   | 1.3   | 6.2   | 5   | 1  | 2   | 9   | 0   | 2465 | 2465 | 2456 |
| 2009 10 | N1 | 120 | 8.0 | 0.96 | 13.8  | 30.1  | 44.8  | 29  | 10 | 56  | 95  | 85  | 2861 | 2776 | 2681 |
| 2009 10 | N2 | 240 | 8.4 | 1.93 | 42.6  | 58.9  | 103.4 | 63  | 25 | 112 | 200 | 171 | 3020 | 2849 | 2649 |
| 2009 10 | N3 | 360 | 8.6 | 3.87 | 131.5 | 87.7  | 223.1 | 108 | 55 | 169 | 332 | 256 | 3076 | 2821 | 2489 |
| 2009 10 | N4 | 480 | 7.7 | 7.77 | 218.8 | 116.5 | 343.1 | 175 | 85 | 225 | 485 | 341 | 2783 | 2442 | 1957 |
| 2009 11 | N0 | 0   | 5.6 | 0.48 | 4.5   | 1.3   | 6.2   | 5   | 1  | 2   | 9   | 0   | 2022 | 2022 | 2013 |
| 2009 11 | N1 | 120 | 6.3 | 0.96 | 13.8  | 30.1  | 44.8  | 29  | 10 | 56  | 95  | 85  | 2253 | 2167 | 2073 |
| 2009 11 | N2 | 240 | 6.9 | 1.93 | 42.6  | 58.9  | 103.4 | 63  | 25 | 112 | 200 | 171 | 2483 | 2313 | 2113 |
| 2009 11 | N3 | 360 | 6.6 | 3.87 | 131.5 | 87.7  | 223.1 | 108 | 55 | 169 | 332 | 256 | 2366 | 2111 | 1779 |
| 2009 11 | N4 | 480 | 6.0 | 7.77 | 218.8 | 116.5 | 343.1 | 175 | 85 | 225 | 485 | 341 | 2142 | 1801 | 1315 |
| 2009 12 | N0 | 0   | 4.7 | 0.48 | 4.5   | 1.3   | 6.2   | 5   | 1  | 2   | 9   | 0   | 1690 | 1690 | 1680 |

---

|         |    |     |     |      |       |       |       |     |    |     |     |     |      |      |      |
|---------|----|-----|-----|------|-------|-------|-------|-----|----|-----|-----|-----|------|------|------|
| 2009 12 | N1 | 120 | 5.5 | 0.96 | 13.8  | 30.1  | 44.8  | 29  | 10 | 56  | 95  | 85  | 1992 | 1907 | 1812 |
| 2009 12 | N2 | 240 | 6.0 | 1.93 | 42.6  | 58.9  | 103.4 | 63  | 25 | 112 | 200 | 171 | 2157 | 1986 | 1786 |
| 2009 12 | N3 | 360 | 5.4 | 3.87 | 131.5 | 87.7  | 223.1 | 108 | 55 | 169 | 332 | 256 | 1935 | 1680 | 1347 |
| 2009 12 | N4 | 480 | 4.8 | 7.77 | 218.8 | 116.5 | 343.1 | 175 | 85 | 225 | 485 | 341 | 1721 | 1380 | 895  |
| 2009 13 | N0 | 0   | 6.6 | 0.48 | 4.5   | 1.3   | 6.2   | 5   | 1  | 2   | 9   | 0   | 2364 | 2364 | 2355 |
| 2009 13 | N1 | 90  | 7.1 | 0.81 | 10.4  | 22.9  | 34.1  | 21  | 7  | 42  | 71  | 64  | 2554 | 2490 | 2419 |
| 2009 13 | N2 | 180 | 7.9 | 1.36 | 24.2  | 44.5  | 70.1  | 45  | 16 | 84  | 146 | 128 | 2844 | 2717 | 2571 |
| 2009 13 | N3 | 270 | 7.1 | 2.30 | 56.4  | 66.1  | 124.8 | 73  | 30 | 126 | 230 | 192 | 2560 | 2368 | 2138 |
| 2009 13 | N4 | 360 | 6.7 | 3.87 | 123.3 | 87.7  | 214.8 | 108 | 53 | 169 | 330 | 256 | 2411 | 2155 | 1825 |
| 2009 14 | N0 | 0   | 7.4 | 0.48 | 4.5   | 1.3   | 6.2   | 5   | 1  | 2   | 9   | 0   | 2666 | 2666 | 2657 |
| 2009 14 | N1 | 90  | 7.7 | 0.81 | 10.4  | 22.9  | 34.1  | 21  | 7  | 42  | 71  | 64  | 2779 | 2715 | 2644 |
| 2009 14 | N2 | 180 | 7.8 | 1.36 | 24.2  | 44.5  | 70.1  | 45  | 16 | 84  | 146 | 128 | 2813 | 2685 | 2539 |
| 2009 14 | N3 | 270 | 8.1 | 2.30 | 56.4  | 66.1  | 124.8 | 73  | 30 | 126 | 230 | 192 | 2910 | 2718 | 2489 |
| 2009 14 | N4 | 360 | 7.5 | 3.87 | 123.3 | 87.7  | 214.8 | 108 | 53 | 169 | 330 | 256 | 2708 | 2452 | 2122 |
| 2009 15 | N0 | 0   | 8.0 | 0.48 | 4.5   | 1.3   | 6.2   | 5   | 1  | 2   | 9   | 0   | 2869 | 2869 | 2860 |
| 2009 15 | N1 | 90  | 8.5 | 0.81 | 10.4  | 22.9  | 34.1  | 21  | 7  | 42  | 71  | 64  | 3058 | 2994 | 2923 |
| 2009 15 | N2 | 180 | 8.9 | 1.36 | 24.2  | 44.5  | 70.1  | 45  | 16 | 84  | 146 | 128 | 3201 | 3073 | 2928 |
| 2009 15 | N3 | 270 | 8.6 | 2.30 | 56.4  | 66.1  | 124.8 | 73  | 30 | 126 | 230 | 192 | 3108 | 2917 | 2687 |
| 2009 15 | N4 | 360 | 8.4 | 3.87 | 123.3 | 87.7  | 214.8 | 108 | 53 | 169 | 330 | 256 | 3021 | 2766 | 2436 |
| 2009 16 | N0 | 0   | 6.7 | 0.48 | 4.5   | 1.3   | 6.2   | 5   | 1  | 2   | 9   | 0   | 2398 | 2398 | 2389 |
| 2009 16 | N1 | 90  | 7.3 | 0.81 | 10.4  | 22.9  | 34.1  | 21  | 7  | 42  | 71  | 64  | 2627 | 2563 | 2493 |

|         |         |    |     |     |      |       |       |       |     |    |     |     |     |      |      |      |
|---------|---------|----|-----|-----|------|-------|-------|-------|-----|----|-----|-----|-----|------|------|------|
|         | 2009 16 | N2 | 180 | 7.8 | 1.36 | 24.2  | 44.5  | 70.1  | 45  | 16 | 84  | 146 | 128 | 2812 | 2684 | 2538 |
|         | 2009 16 | N3 | 270 | 7.4 | 2.30 | 56.4  | 66.1  | 124.8 | 73  | 30 | 126 | 230 | 192 | 2656 | 2464 | 2234 |
|         | 2009 16 | N4 | 360 | 6.8 | 3.87 | 123.3 | 87.7  | 214.8 | 108 | 53 | 169 | 330 | 256 | 2450 | 2194 | 1864 |
|         | 2009 17 | N0 | 0   | 7.0 | 0.48 | 4.5   | 1.3   | 6.2   | 5   | 1  | 2   | 9   | 0   | 2515 | 2515 | 2506 |
|         | 2009 17 | N1 | 90  | 7.8 | 0.81 | 10.4  | 22.9  | 34.1  | 21  | 7  | 42  | 71  | 64  | 2794 | 2730 | 2660 |
|         | 2009 17 | N2 | 180 | 8.4 | 1.36 | 24.2  | 44.5  | 70.1  | 45  | 16 | 84  | 146 | 128 | 3007 | 2879 | 2734 |
|         | 2009 17 | N3 | 270 | 9.5 | 2.30 | 56.4  | 66.1  | 124.8 | 73  | 30 | 126 | 230 | 192 | 3414 | 3222 | 2992 |
|         | 2009 17 | N4 | 360 | 7.4 | 3.87 | 123.3 | 87.7  | 214.8 | 108 | 53 | 169 | 330 | 256 | 2649 | 2393 | 2063 |
|         | 2009 18 | N0 | 0   | 8.0 | 0.48 | 4.5   | 1.3   | 6.2   | 5   | 1  | 2   | 9   | 0   | 2882 | 2882 | 2873 |
|         | 2009 18 | N1 | 90  | 8.4 | 0.81 | 10.4  | 22.9  | 34.1  | 21  | 7  | 42  | 71  | 64  | 3020 | 2956 | 2885 |
|         | 2009 18 | N2 | 180 | 8.6 | 1.36 | 24.2  | 44.5  | 70.1  | 45  | 16 | 84  | 146 | 128 | 3088 | 2960 | 2815 |
|         | 2009 18 | N3 | 270 | 8.3 | 2.30 | 56.4  | 66.1  | 124.8 | 73  | 30 | 126 | 230 | 192 | 2985 | 2793 | 2563 |
|         | 2009 18 | N4 | 360 | 8.0 | 3.87 | 123.3 | 87.7  | 214.8 | 108 | 53 | 169 | 330 | 256 | 2860 | 2604 | 2274 |
| Nanyang | 2009 1  | N0 | 0   | 6.3 | 0.48 | 4.5   | 1.3   | 6.2   | 5   | 1  | 2   | 9   | 0   | 2262 | 2262 | 2253 |
|         | 2009 1  | N1 | 120 | 7.1 | 0.96 | 13.8  | 30.1  | 44.8  | 29  | 10 | 56  | 95  | 85  | 2567 | 2481 | 2387 |
|         | 2009 1  | N2 | 240 | 7.5 | 1.93 | 42.6  | 58.9  | 103.4 | 63  | 25 | 112 | 200 | 171 | 2701 | 2531 | 2331 |
|         | 2009 1  | N3 | 360 | 7.4 | 3.87 | 131.5 | 87.7  | 223.1 | 108 | 55 | 169 | 332 | 256 | 2660 | 2404 | 2072 |
|         | 2009 1  | N4 | 480 | 6.8 | 7.77 | 218.8 | 116.5 | 343.1 | 175 | 85 | 225 | 485 | 341 | 2428 | 2087 | 1602 |
|         | 2009 2  | N0 | 0   | 6.2 | 0.48 | 4.5   | 1.3   | 6.2   | 5   | 1  | 2   | 9   | 0   | 2246 | 2246 | 2236 |
|         | 2009 2  | N1 | 120 | 7.2 | 0.96 | 13.8  | 30.1  | 44.8  | 29  | 10 | 56  | 95  | 85  | 2573 | 2488 | 2393 |
|         | 2009 2  | N2 | 240 | 6.7 | 1.93 | 42.6  | 58.9  | 103.4 | 63  | 25 | 112 | 200 | 171 | 2403 | 2233 | 2032 |

|              |      |   |    |     |     |      |       |       |       |     |    |     |     |     |      |      |      |
|--------------|------|---|----|-----|-----|------|-------|-------|-------|-----|----|-----|-----|-----|------|------|------|
|              | 2009 | 2 | N3 | 360 | 6.7 | 3.87 | 131.5 | 87.7  | 223.1 | 108 | 55 | 169 | 332 | 256 | 2422 | 2166 | 1834 |
|              | 2009 | 2 | N4 | 480 | 6.6 | 7.77 | 218.8 | 116.5 | 343.1 | 175 | 85 | 225 | 485 | 341 | 2369 | 2028 | 1542 |
|              | 2009 | 3 | N0 | 0   | 5.4 | 0.48 | 4.5   | 1.3   | 6.2   | 5   | 1  | 2   | 9   | 0   | 1957 | 1957 | 1948 |
|              | 2009 | 3 | N1 | 120 | 7.2 | 0.96 | 13.8  | 30.1  | 44.8  | 29  | 10 | 56  | 95  | 85  | 2586 | 2501 | 2406 |
|              | 2009 | 3 | N2 | 240 | 7.4 | 1.93 | 42.6  | 58.9  | 103.4 | 63  | 25 | 112 | 200 | 171 | 2663 | 2492 | 2292 |
|              | 2009 | 3 | N3 | 360 | 7.1 | 3.87 | 131.5 | 87.7  | 223.1 | 108 | 55 | 169 | 332 | 256 | 2559 | 2303 | 1971 |
|              | 2009 | 3 | N4 | 480 | 7.1 | 7.77 | 218.8 | 116.5 | 343.1 | 175 | 85 | 225 | 485 | 341 | 2559 | 2218 | 1732 |
| Pingdingshan | 2009 | 1 | N0 | 0   | 3.7 | 0.48 | 4.5   | 1.3   | 6.2   | 5   | 1  | 2   | 9   | 0   | 1325 | 1325 | 1316 |
|              | 2009 | 1 | N1 | 120 | 4.4 | 0.96 | 13.8  | 30.1  | 44.8  | 29  | 10 | 56  | 95  | 85  | 1583 | 1498 | 1403 |
|              | 2009 | 1 | N2 | 240 | 6.2 | 1.93 | 42.6  | 58.9  | 103.4 | 63  | 25 | 112 | 200 | 171 | 2239 | 2068 | 1868 |
|              | 2009 | 1 | N3 | 360 | 5.5 | 3.87 | 131.5 | 87.7  | 223.1 | 108 | 55 | 169 | 332 | 256 | 1967 | 1711 | 1379 |
|              | 2009 | 1 | N4 | 480 | 5.0 | 7.77 | 218.8 | 116.5 | 343.1 | 175 | 85 | 225 | 485 | 341 | 1785 | 1444 | 959  |
|              | 2009 | 2 | N0 | 0   | 3.8 | 0.48 | 4.5   | 1.3   | 6.2   | 5   | 1  | 2   | 9   | 0   | 1366 | 1366 | 1357 |
|              | 2009 | 2 | N1 | 120 | 4.5 | 0.96 | 13.8  | 30.1  | 44.8  | 29  | 10 | 56  | 95  | 85  | 1632 | 1547 | 1452 |
|              | 2009 | 2 | N2 | 240 | 6.4 | 1.93 | 42.6  | 58.9  | 103.4 | 63  | 25 | 112 | 200 | 171 | 2308 | 2137 | 1937 |
|              | 2009 | 2 | N3 | 360 | 5.6 | 3.87 | 131.5 | 87.7  | 223.1 | 108 | 55 | 169 | 332 | 256 | 2027 | 1772 | 1440 |
|              | 2009 | 2 | N4 | 480 | 5.1 | 7.77 | 218.8 | 116.5 | 343.1 | 175 | 85 | 225 | 485 | 341 | 1841 | 1500 | 1014 |
|              | 2009 | 3 | N0 | 0   | 4.8 | 0.48 | 4.5   | 1.3   | 6.2   | 5   | 1  | 2   | 9   | 0   | 1723 | 1723 | 1713 |
|              | 2009 | 3 | N1 | 120 | 5.7 | 0.96 | 13.8  | 30.1  | 44.8  | 29  | 10 | 56  | 95  | 85  | 2058 | 1973 | 1878 |
|              | 2009 | 3 | N2 | 240 | 8.1 | 1.93 | 42.6  | 58.9  | 103.4 | 63  | 25 | 112 | 200 | 171 | 2910 | 2740 | 2540 |
|              | 2009 | 3 | N3 | 360 | 7.1 | 3.87 | 131.5 | 87.7  | 223.1 | 108 | 55 | 169 | 332 | 256 | 2557 | 2301 | 1969 |



|            |      |   |    |     |     |      |       |       |       |     |    |     |     |     |      |      |      |
|------------|------|---|----|-----|-----|------|-------|-------|-------|-----|----|-----|-----|-----|------|------|------|
|            | 2009 | 3 | N4 | 480 | 6.5 | 7.77 | 218.8 | 116.5 | 343.1 | 175 | 85 | 225 | 485 | 341 | 2321 | 1980 | 1495 |
|            | 2009 | 4 | N0 | 0   | 3.2 | 0.48 | 4.5   | 1.3   | 6.2   | 5   | 1  | 2   | 9   | 0   | 1138 | 1138 | 1129 |
|            | 2009 | 4 | N1 | 120 | 3.8 | 0.96 | 13.8  | 30.1  | 44.8  | 29  | 10 | 56  | 95  | 85  | 1360 | 1275 | 1180 |
|            | 2009 | 4 | N2 | 240 | 5.4 | 1.93 | 42.6  | 58.9  | 103.4 | 63  | 25 | 112 | 200 | 171 | 1923 | 1753 | 1552 |
|            | 2009 | 4 | N3 | 360 | 4.7 | 3.87 | 131.5 | 87.7  | 223.1 | 108 | 55 | 169 | 332 | 256 | 1690 | 1434 | 1102 |
|            | 2009 | 4 | N4 | 480 | 4.3 | 7.77 | 218.8 | 116.5 | 343.1 | 175 | 85 | 225 | 485 | 341 | 1534 | 1193 | 707  |
| Shanmenxia | 2009 | 1 | N0 | 0   | 4.5 | 0.48 | 4.5   | 1.3   | 6.2   | 5   | 1  | 2   | 9   | 0   | 1609 | 1609 | 1599 |
|            | 2009 | 1 | N1 | 120 | 5.9 | 0.96 | 13.8  | 30.1  | 44.8  | 29  | 10 | 56  | 95  | 85  | 2127 | 2042 | 1947 |
|            | 2009 | 1 | N2 | 240 | 6.7 | 1.93 | 42.6  | 58.9  | 103.4 | 63  | 25 | 112 | 200 | 171 | 2418 | 2247 | 2047 |
|            | 2009 | 1 | N3 | 360 | 6.3 | 3.87 | 131.5 | 87.7  | 223.1 | 108 | 55 | 169 | 332 | 256 | 2256 | 2000 | 1668 |
|            | 2009 | 1 | N4 | 480 | 6.0 | 7.77 | 218.8 | 116.5 | 343.1 | 175 | 85 | 225 | 485 | 341 | 2172 | 1831 | 1346 |
|            | 2009 | 2 | N0 | 0   | 5.6 | 0.48 | 4.5   | 1.3   | 6.2   | 5   | 1  | 2   | 9   | 0   | 2016 | 2016 | 2007 |
|            | 2009 | 2 | N1 | 120 | 6.0 | 0.96 | 13.8  | 30.1  | 44.8  | 29  | 10 | 56  | 95  | 85  | 2142 | 2057 | 1962 |
|            | 2009 | 2 | N2 | 240 | 7.3 | 1.93 | 42.6  | 58.9  | 103.4 | 63  | 25 | 112 | 200 | 171 | 2636 | 2466 | 2266 |
|            | 2009 | 2 | N3 | 360 | 6.8 | 3.87 | 131.5 | 87.7  | 223.1 | 108 | 55 | 169 | 332 | 256 | 2433 | 2177 | 1845 |
|            | 2009 | 2 | N4 | 480 | 6.3 | 7.77 | 218.8 | 116.5 | 343.1 | 175 | 85 | 225 | 485 | 341 | 2259 | 1918 | 1433 |
|            | 2009 | 3 | N0 | 0   | 4.3 | 0.48 | 4.5   | 1.3   | 6.2   | 5   | 1  | 2   | 9   | 0   | 1528 | 1528 | 1519 |
|            | 2009 | 3 | N1 | 120 | 5.5 | 0.96 | 13.8  | 30.1  | 44.8  | 29  | 10 | 56  | 95  | 85  | 1992 | 1907 | 1812 |
|            | 2009 | 3 | N2 | 240 | 6.7 | 1.93 | 42.6  | 58.9  | 103.4 | 63  | 25 | 112 | 200 | 171 | 2391 | 2220 | 2020 |
|            | 2009 | 3 | N3 | 360 | 6.0 | 3.87 | 131.5 | 87.7  | 223.1 | 108 | 55 | 169 | 332 | 256 | 2172 | 1916 | 1584 |
|            | 2009 | 3 | N4 | 480 | 5.8 | 7.77 | 218.8 | 116.5 | 343.1 | 175 | 85 | 225 | 485 | 341 | 2097 | 1756 | 1271 |

|          |      |   |    |     |     |      |       |       |       |     |    |     |     |     |      |      |      |
|----------|------|---|----|-----|-----|------|-------|-------|-------|-----|----|-----|-----|-----|------|------|------|
|          | 2009 | 4 | N0 | 0   | 6.1 | 0.48 | 4.5   | 1.3   | 6.2   | 5   | 1  | 2   | 9   | 0   | 2175 | 2175 | 2166 |
|          | 2009 | 4 | N1 | 120 | 6.3 | 0.96 | 13.8  | 30.1  | 44.8  | 29  | 10 | 56  | 95  | 85  | 2271 | 2186 | 2091 |
|          | 2009 | 4 | N2 | 240 | 7.4 | 1.93 | 42.6  | 58.9  | 103.4 | 63  | 25 | 112 | 200 | 171 | 2660 | 2490 | 2290 |
|          | 2009 | 4 | N3 | 360 | 7.2 | 3.87 | 131.5 | 87.7  | 223.1 | 108 | 55 | 169 | 332 | 256 | 2570 | 2315 | 1983 |
|          | 2009 | 4 | N4 | 480 | 6.7 | 7.77 | 218.8 | 116.5 | 343.1 | 175 | 85 | 225 | 485 | 341 | 2418 | 2077 | 1591 |
| Shangqiu | 2009 | 1 | N0 | 0   | 6.8 | 0.48 | 4.5   | 1.3   | 6.2   | 5   | 1  | 2   | 9   | 0   | 2428 | 2428 | 2418 |
|          | 2009 | 1 | N1 | 120 | 7.8 | 0.96 | 13.8  | 30.1  | 44.8  | 29  | 10 | 56  | 95  | 85  | 2797 | 2712 | 2617 |
|          | 2009 | 1 | N2 | 240 | 8.8 | 1.93 | 42.6  | 58.9  | 103.4 | 63  | 25 | 112 | 200 | 171 | 3165 | 2995 | 2794 |
|          | 2009 | 1 | N3 | 360 | 8.4 | 3.87 | 131.5 | 87.7  | 223.1 | 108 | 55 | 169 | 332 | 256 | 3014 | 2758 | 2426 |
|          | 2009 | 1 | N4 | 480 | 8.5 | 7.77 | 218.8 | 116.5 | 343.1 | 175 | 85 | 225 | 485 | 341 | 3039 | 2698 | 2212 |
|          | 2009 | 2 | N0 | 0   | 5.9 | 0.48 | 4.5   | 1.3   | 6.2   | 5   | 1  | 2   | 9   | 0   | 2111 | 2111 | 2102 |
|          | 2009 | 2 | N1 | 120 | 8.2 | 0.96 | 13.8  | 30.1  | 44.8  | 29  | 10 | 56  | 95  | 85  | 2934 | 2849 | 2754 |
|          | 2009 | 2 | N2 | 240 | 8.7 | 1.93 | 42.6  | 58.9  | 103.4 | 63  | 25 | 112 | 200 | 171 | 3122 | 2951 | 2751 |
|          | 2009 | 2 | N3 | 360 | 8.4 | 3.87 | 131.5 | 87.7  | 223.1 | 108 | 55 | 169 | 332 | 256 | 3006 | 2750 | 2418 |
|          | 2009 | 2 | N4 | 480 | 7.7 | 7.77 | 218.8 | 116.5 | 343.1 | 175 | 85 | 225 | 485 | 341 | 2751 | 2410 | 1925 |
|          | 2009 | 3 | N0 | 0   | 6.7 | 0.48 | 4.5   | 1.3   | 6.2   | 5   | 1  | 2   | 9   | 0   | 2391 | 2391 | 2381 |
|          | 2009 | 3 | N1 | 120 | 8.3 | 0.96 | 13.8  | 30.1  | 44.8  | 29  | 10 | 56  | 95  | 85  | 2980 | 2894 | 2799 |
|          | 2009 | 3 | N2 | 240 | 8.8 | 1.93 | 42.6  | 58.9  | 103.4 | 63  | 25 | 112 | 200 | 171 | 3151 | 2981 | 2781 |
|          | 2009 | 3 | N3 | 360 | 9.2 | 3.87 | 131.5 | 87.7  | 223.1 | 108 | 55 | 169 | 332 | 256 | 3293 | 3037 | 2705 |
|          | 2009 | 3 | N4 | 480 | 9.0 | 7.77 | 218.8 | 116.5 | 343.1 | 175 | 85 | 225 | 485 | 341 | 3236 | 2895 | 2410 |
|          | 2009 | 4 | N0 | 0   | 6.3 | 0.48 | 4.5   | 1.3   | 6.2   | 5   | 1  | 2   | 9   | 0   | 2277 | 2277 | 2268 |

|          |      |   |    |     |     |      |       |       |       |     |    |     |     |     |      |      |      |
|----------|------|---|----|-----|-----|------|-------|-------|-------|-----|----|-----|-----|-----|------|------|------|
|          | 2009 | 4 | N1 | 120 | 8.2 | 0.96 | 13.8  | 30.1  | 44.8  | 29  | 10 | 56  | 95  | 85  | 2947 | 2862 | 2767 |
|          | 2009 | 4 | N2 | 240 | 8.5 | 1.93 | 42.6  | 58.9  | 103.4 | 63  | 25 | 112 | 200 | 171 | 3063 | 2893 | 2692 |
|          | 2009 | 4 | N3 | 360 | 9.0 | 3.87 | 131.5 | 87.7  | 223.1 | 108 | 55 | 169 | 332 | 256 | 3235 | 2980 | 2647 |
|          | 2009 | 4 | N4 | 480 | 8.4 | 7.77 | 218.8 | 116.5 | 343.1 | 175 | 85 | 225 | 485 | 341 | 3035 | 2694 | 2208 |
| Xinxiang | 2008 | 1 | N0 | 0   | 6.8 | 0.48 | 4.5   | 1.3   | 6.2   | 5   | 1  | 2   | 9   | 0   | 2443 | 2443 | 2433 |
|          | 2008 | 1 | N1 | 120 | 7.3 | 0.96 | 13.8  | 30.1  | 44.8  | 29  | 10 | 56  | 95  | 85  | 2637 | 2552 | 2457 |
|          | 2008 | 1 | N2 | 240 | 7.8 | 1.93 | 42.6  | 58.9  | 103.4 | 63  | 25 | 112 | 200 | 171 | 2795 | 2624 | 2424 |
|          | 2008 | 1 | N3 | 360 | 7.1 | 3.87 | 131.5 | 87.7  | 223.1 | 108 | 55 | 169 | 332 | 256 | 2552 | 2297 | 1964 |
|          | 2008 | 1 | N4 | 480 | 6.7 | 7.77 | 218.8 | 116.5 | 343.1 | 175 | 85 | 225 | 485 | 341 | 2403 | 2062 | 1577 |
|          | 2008 | 2 | N0 | 0   | 6.4 | 0.48 | 4.5   | 1.3   | 6.2   | 5   | 1  | 2   | 9   | 0   | 2315 | 2315 | 2306 |
|          | 2008 | 2 | N1 | 120 | 8.1 | 0.96 | 13.8  | 30.1  | 44.8  | 29  | 10 | 56  | 95  | 85  | 2919 | 2834 | 2739 |
|          | 2008 | 2 | N2 | 240 | 8.7 | 1.93 | 42.6  | 58.9  | 103.4 | 63  | 25 | 112 | 200 | 171 | 3118 | 2948 | 2748 |
|          | 2008 | 2 | N3 | 360 | 9.3 | 3.87 | 131.5 | 87.7  | 223.1 | 108 | 55 | 169 | 332 | 256 | 3354 | 3098 | 2766 |
|          | 2008 | 2 | N4 | 480 | 9.3 | 7.77 | 218.8 | 116.5 | 343.1 | 175 | 85 | 225 | 485 | 341 | 3352 | 3011 | 2526 |
|          | 2009 | 3 | N0 | 0   | 5.6 | 0.48 | 4.5   | 1.3   | 6.2   | 5   | 1  | 2   | 9   | 0   | 2025 | 2025 | 2016 |
|          | 2009 | 3 | N1 | 120 | 6.5 | 0.96 | 13.8  | 30.1  | 44.8  | 29  | 10 | 56  | 95  | 85  | 2343 | 2258 | 2163 |
|          | 2009 | 3 | N2 | 240 | 7.6 | 1.93 | 42.6  | 58.9  | 103.4 | 63  | 25 | 112 | 200 | 171 | 2723 | 2553 | 2352 |
|          | 2009 | 3 | N3 | 360 | 7.1 | 3.87 | 131.5 | 87.7  | 223.1 | 108 | 55 | 169 | 332 | 256 | 2563 | 2308 | 1976 |
|          | 2009 | 3 | N4 | 480 | 7.8 | 7.77 | 218.8 | 116.5 | 343.1 | 175 | 85 | 225 | 485 | 341 | 2792 | 2451 | 1966 |
|          | 2009 | 4 | N0 | 0   | 7.1 | 0.48 | 4.5   | 1.3   | 6.2   | 5   | 1  | 2   | 9   | 0   | 2568 | 2568 | 2558 |
|          | 2009 | 4 | N1 | 120 | 8.2 | 0.96 | 13.8  | 30.1  | 44.8  | 29  | 10 | 56  | 95  | 85  | 2956 | 2871 | 2776 |

|           |      |   |    |     |     |      |       |       |       |     |    |     |     |     |      |      |      |
|-----------|------|---|----|-----|-----|------|-------|-------|-------|-----|----|-----|-----|-----|------|------|------|
|           | 2009 | 4 | N2 | 240 | 9.2 | 1.93 | 42.6  | 58.9  | 103.4 | 63  | 25 | 112 | 200 | 171 | 3311 | 3141 | 2940 |
|           | 2009 | 4 | N3 | 360 | 9.6 | 3.87 | 131.5 | 87.7  | 223.1 | 108 | 55 | 169 | 332 | 256 | 3451 | 3195 | 2863 |
|           | 2009 | 4 | N4 | 480 | 9.1 | 7.77 | 218.8 | 116.5 | 343.1 | 175 | 85 | 225 | 485 | 341 | 3283 | 2942 | 2456 |
|           | 2009 | 5 | N0 | 0   | 7.7 | 0.48 | 4.5   | 1.3   | 6.2   | 5   | 1  | 2   | 9   | 0   | 2761 | 2761 | 2751 |
|           | 2009 | 5 | N1 | 120 | 8.8 | 0.96 | 13.8  | 30.1  | 44.8  | 29  | 10 | 56  | 95  | 85  | 3177 | 3092 | 2997 |
|           | 2009 | 5 | N2 | 240 | 9.4 | 1.93 | 42.6  | 58.9  | 103.4 | 63  | 25 | 112 | 200 | 171 | 3374 | 3204 | 3003 |
|           | 2009 | 5 | N3 | 360 | 9.5 | 3.87 | 131.5 | 87.7  | 223.1 | 108 | 55 | 169 | 332 | 256 | 3413 | 3157 | 2825 |
|           | 2009 | 5 | N4 | 480 | 9.0 | 7.77 | 218.8 | 116.5 | 343.1 | 175 | 85 | 225 | 485 | 341 | 3225 | 2884 | 2398 |
| Zhengzhou | 2009 | 1 | N0 | 0   | 6.1 | 0.48 | 4.5   | 1.3   | 6.2   | 5   | 1  | 2   | 9   | 0   | 2198 | 2198 | 2189 |
|           | 2009 | 1 | N1 | 120 | 7.5 | 0.96 | 13.8  | 30.1  | 44.8  | 29  | 10 | 56  | 95  | 85  | 2691 | 2606 | 2511 |
|           | 2009 | 1 | N2 | 240 | 7.9 | 1.93 | 42.6  | 58.9  | 103.4 | 63  | 25 | 112 | 200 | 171 | 2835 | 2664 | 2464 |
|           | 2009 | 1 | N3 | 360 | 7.3 | 3.87 | 131.5 | 87.7  | 223.1 | 108 | 55 | 169 | 332 | 256 | 2609 | 2353 | 2021 |
|           | 2009 | 1 | N4 | 480 | 7.5 | 7.77 | 218.8 | 116.5 | 343.1 | 175 | 85 | 225 | 485 | 341 | 2691 | 2350 | 1864 |
|           | 2009 | 2 | N0 | 0   | 6.1 | 0.48 | 4.5   | 1.3   | 6.2   | 5   | 1  | 2   | 9   | 0   | 2185 | 2185 | 2175 |
|           | 2009 | 2 | N1 | 120 | 6.7 | 0.96 | 13.8  | 30.1  | 44.8  | 29  | 10 | 56  | 95  | 85  | 2404 | 2318 | 2224 |
|           | 2009 | 2 | N2 | 240 | 7.0 | 1.93 | 42.6  | 58.9  | 103.4 | 63  | 25 | 112 | 200 | 171 | 2498 | 2328 | 2128 |
|           | 2009 | 2 | N3 | 360 | 6.9 | 3.87 | 131.5 | 87.7  | 223.1 | 108 | 55 | 169 | 332 | 256 | 2474 | 2218 | 1886 |
|           | 2009 | 2 | N4 | 480 | 6.7 | 7.77 | 218.8 | 116.5 | 343.1 | 175 | 85 | 225 | 485 | 341 | 2396 | 2055 | 1570 |
|           | 2009 | 3 | N0 | 0   | 6.1 | 0.48 | 4.5   | 1.3   | 6.2   | 5   | 1  | 2   | 9   | 0   | 2196 | 2196 | 2187 |
|           | 2009 | 3 | N1 | 120 | 7.3 | 0.96 | 13.8  | 30.1  | 44.8  | 29  | 10 | 56  | 95  | 85  | 2619 | 2534 | 2439 |
|           | 2009 | 3 | N2 | 240 | 7.7 | 1.93 | 42.6  | 58.9  | 103.4 | 63  | 25 | 112 | 200 | 171 | 2783 | 2612 | 2412 |

|         |      |   |    |     |     |      |       |       |       |     |    |     |     |     |      |      |      |
|---------|------|---|----|-----|-----|------|-------|-------|-------|-----|----|-----|-----|-----|------|------|------|
|         | 2009 | 3 | N3 | 360 | 7.6 | 3.87 | 131.5 | 87.7  | 223.1 | 108 | 55 | 169 | 332 | 256 | 2737 | 2482 | 2149 |
|         | 2009 | 3 | N4 | 480 | 7.4 | 7.77 | 218.8 | 116.5 | 343.1 | 175 | 85 | 225 | 485 | 341 | 2661 | 2320 | 1834 |
| Zhoukou | 2008 | 1 | N0 | 0   | 6.8 | 0.48 | 4.5   | 1.3   | 6.2   | 5   | 1  | 2   | 9   | 0   | 2458 | 2458 | 2448 |
|         | 2008 | 1 | N1 | 60  | 7.1 | 0.68 | 7.8   | 15.7  | 24.2  | 14  | 5  | 28  | 47  | 43  | 2539 | 2496 | 2449 |
|         | 2008 | 1 | N2 | 120 | 8.5 | 0.96 | 13.8  | 30.1  | 44.8  | 29  | 10 | 56  | 95  | 85  | 3049 | 2964 | 2869 |
|         | 2008 | 1 | N3 | 180 | 9.1 | 1.36 | 24.2  | 44.5  | 70.1  | 45  | 16 | 84  | 146 | 128 | 3269 | 3141 | 2995 |
|         | 2008 | 1 | N4 | 240 | 8.3 | 1.93 | 42.6  | 58.9  | 103.4 | 63  | 25 | 112 | 200 | 171 | 2966 | 2796 | 2596 |
|         | 2008 | 2 | N0 | 0   | 6.3 | 0.48 | 4.5   | 1.3   | 6.2   | 5   | 1  | 2   | 9   | 0   | 2249 | 2249 | 2240 |
|         | 2008 | 2 | N1 | 120 | 8.5 | 0.96 | 13.8  | 30.1  | 44.8  | 29  | 10 | 56  | 95  | 85  | 3069 | 2984 | 2889 |
|         | 2008 | 2 | N2 | 240 | 8.8 | 1.93 | 42.6  | 58.9  | 103.4 | 63  | 25 | 112 | 200 | 171 | 3177 | 3006 | 2806 |
|         | 2008 | 2 | N3 | 360 | 8.6 | 3.87 | 131.5 | 87.7  | 223.1 | 108 | 55 | 169 | 332 | 256 | 3094 | 2838 | 2506 |
|         | 2008 | 2 | N4 | 480 | 8.7 | 7.77 | 218.8 | 116.5 | 343.1 | 175 | 85 | 225 | 485 | 341 | 3110 | 2768 | 2283 |
|         | 2008 | 3 | N0 | 0   | 6.0 | 0.48 | 4.5   | 1.3   | 6.2   | 5   | 1  | 2   | 9   | 0   | 2153 | 2153 | 2144 |
|         | 2008 | 3 | N1 | 120 | 8.8 | 0.96 | 13.8  | 30.1  | 44.8  | 29  | 10 | 56  | 95  | 85  | 3159 | 3074 | 2979 |
|         | 2008 | 3 | N2 | 240 | 9.0 | 1.93 | 42.6  | 58.9  | 103.4 | 63  | 25 | 112 | 200 | 171 | 3241 | 3071 | 2870 |
|         | 2008 | 3 | N3 | 360 | 8.5 | 3.87 | 131.5 | 87.7  | 223.1 | 108 | 55 | 169 | 332 | 256 | 3070 | 2814 | 2482 |
|         | 2008 | 3 | N4 | 480 | 8.8 | 7.77 | 218.8 | 116.5 | 343.1 | 175 | 85 | 225 | 485 | 341 | 3147 | 2806 | 2321 |
|         | 2008 | 4 | N0 | 0   | 6.8 | 0.48 | 4.5   | 1.3   | 6.2   | 5   | 1  | 2   | 9   | 0   | 2434 | 2434 | 2425 |
|         | 2008 | 4 | N1 | 120 | 8.6 | 0.96 | 13.8  | 30.1  | 44.8  | 29  | 10 | 56  | 95  | 85  | 3083 | 2997 | 2902 |
|         | 2008 | 4 | N2 | 240 | 8.4 | 1.93 | 42.6  | 58.9  | 103.4 | 63  | 25 | 112 | 200 | 171 | 3005 | 2834 | 2634 |
|         | 2008 | 4 | N3 | 360 | 8.3 | 3.87 | 131.5 | 87.7  | 223.1 | 108 | 55 | 169 | 332 | 256 | 2971 | 2715 | 2383 |

|      |   |    |     |     |      |       |       |       |     |    |     |     |     |      |      |      |
|------|---|----|-----|-----|------|-------|-------|-------|-----|----|-----|-----|-----|------|------|------|
| 2008 | 4 | N4 | 480 | 8.4 | 7.77 | 218.8 | 116.5 | 343.1 | 175 | 85 | 225 | 485 | 341 | 3028 | 2687 | 2201 |
| 2008 | 5 | N0 | 0   | 7.5 | 0.48 | 4.5   | 1.3   | 6.2   | 5   | 1  | 2   | 9   | 0   | 2690 | 2690 | 2681 |
| 2008 | 5 | N1 | 120 | 8.2 | 0.96 | 13.8  | 30.1  | 44.8  | 29  | 10 | 56  | 95  | 85  | 2960 | 2875 | 2780 |
| 2008 | 5 | N2 | 240 | 8.3 | 1.93 | 42.6  | 58.9  | 103.4 | 63  | 25 | 112 | 200 | 171 | 2972 | 2802 | 2602 |
| 2008 | 5 | N3 | 360 | 8.3 | 3.87 | 131.5 | 87.7  | 223.1 | 108 | 55 | 169 | 332 | 256 | 2989 | 2733 | 2401 |
| 2008 | 5 | N4 | 480 | 8.2 | 7.77 | 218.8 | 116.5 | 343.1 | 175 | 85 | 225 | 485 | 341 | 2933 | 2592 | 2106 |
| 2009 | 6 | N0 | 0   | 4.6 | 0.48 | 4.5   | 1.3   | 6.2   | 5   | 1  | 2   | 9   | 0   | 1667 | 1667 | 1657 |
| 2009 | 6 | N1 | 120 | 5.9 | 0.96 | 13.8  | 30.1  | 44.8  | 29  | 10 | 56  | 95  | 85  | 2127 | 2042 | 1947 |
| 2009 | 6 | N2 | 240 | 7.0 | 1.93 | 42.6  | 58.9  | 103.4 | 63  | 25 | 112 | 200 | 171 | 2510 | 2340 | 2140 |
| 2009 | 6 | N3 | 360 | 6.5 | 3.87 | 131.5 | 87.7  | 223.1 | 108 | 55 | 169 | 332 | 256 | 2348 | 2093 | 1761 |
| 2009 | 6 | N4 | 480 | 6.2 | 7.77 | 218.8 | 116.5 | 343.1 | 175 | 85 | 225 | 485 | 341 | 2211 | 1870 | 1384 |
| 2009 | 7 | N0 | 0   | 4.1 | 0.48 | 4.5   | 1.3   | 6.2   | 5   | 1  | 2   | 9   | 0   | 1488 | 1488 | 1478 |
| 2009 | 7 | N1 | 120 | 5.5 | 0.96 | 13.8  | 30.1  | 44.8  | 29  | 10 | 56  | 95  | 85  | 1989 | 1904 | 1809 |
| 2009 | 7 | N2 | 240 | 6.5 | 1.93 | 42.6  | 58.9  | 103.4 | 63  | 25 | 112 | 200 | 171 | 2333 | 2162 | 1962 |
| 2009 | 7 | N3 | 360 | 6.2 | 3.87 | 131.5 | 87.7  | 223.1 | 108 | 55 | 169 | 332 | 256 | 2225 | 1969 | 1637 |
| 2009 | 7 | N4 | 480 | 6.0 | 7.77 | 218.8 | 116.5 | 343.1 | 175 | 85 | 225 | 485 | 341 | 2162 | 1821 | 1335 |
| 2009 | 8 | N0 | 0   | 4.4 | 0.48 | 4.5   | 1.3   | 6.2   | 5   | 1  | 2   | 9   | 0   | 1581 | 1581 | 1572 |
| 2009 | 8 | N1 | 120 | 6.0 | 0.96 | 13.8  | 30.1  | 44.8  | 29  | 10 | 56  | 95  | 85  | 2164 | 2079 | 1984 |
| 2009 | 8 | N2 | 240 | 6.5 | 1.93 | 42.6  | 58.9  | 103.4 | 63  | 25 | 112 | 200 | 171 | 2323 | 2153 | 1953 |
| 2009 | 8 | N3 | 360 | 6.3 | 3.87 | 131.5 | 87.7  | 223.1 | 108 | 55 | 169 | 332 | 256 | 2260 | 2004 | 1672 |
| 2009 | 8 | N4 | 480 | 6.2 | 7.77 | 218.8 | 116.5 | 343.1 | 175 | 85 | 225 | 485 | 341 | 2246 | 1905 | 1420 |

|           |      |    |    |     |      |      |       |       |       |     |    |     |     |     |      |      |      |
|-----------|------|----|----|-----|------|------|-------|-------|-------|-----|----|-----|-----|-----|------|------|------|
|           | 2009 | 9  | N0 | 0   | 4.2  | 0.48 | 4.5   | 1.3   | 6.2   | 5   | 1  | 2   | 9   | 0   | 1521 | 1521 | 1512 |
|           | 2009 | 9  | N1 | 120 | 6.4  | 0.96 | 13.8  | 30.1  | 44.8  | 29  | 10 | 56  | 95  | 85  | 2302 | 2217 | 2122 |
|           | 2009 | 9  | N2 | 240 | 6.9  | 1.93 | 42.6  | 58.9  | 103.4 | 63  | 25 | 112 | 200 | 171 | 2483 | 2313 | 2113 |
|           | 2009 | 9  | N3 | 360 | 6.7  | 3.87 | 131.5 | 87.7  | 223.1 | 108 | 55 | 169 | 332 | 256 | 2403 | 2147 | 1815 |
|           | 2009 | 9  | N4 | 480 | 6.6  | 7.77 | 218.8 | 116.5 | 343.1 | 175 | 85 | 225 | 485 | 341 | 2372 | 2031 | 1546 |
|           | 2009 | 10 | N0 | 0   | 8.6  | 0.48 | 4.5   | 1.3   | 6.2   | 5   | 1  | 2   | 9   | 0   | 3106 | 3106 | 3097 |
|           | 2009 | 10 | N1 | 120 | 9.0  | 0.96 | 13.8  | 30.1  | 44.8  | 29  | 10 | 56  | 95  | 85  | 3238 | 3152 | 3058 |
|           | 2009 | 10 | N2 | 240 | 9.8  | 1.93 | 42.6  | 58.9  | 103.4 | 63  | 25 | 112 | 200 | 171 | 3526 | 3356 | 3156 |
|           | 2009 | 10 | N3 | 360 | 10.2 | 3.87 | 131.5 | 87.7  | 223.1 | 108 | 55 | 169 | 332 | 256 | 3674 | 3418 | 3086 |
|           | 2009 | 10 | N4 | 480 | 9.8  | 7.77 | 218.8 | 116.5 | 343.1 | 175 | 85 | 225 | 485 | 341 | 3528 | 3187 | 2701 |
| Zhumadian | 2008 | 1  | N0 | 0   | 10.3 | 0.48 | 4.5   | 1.3   | 6.2   | 5   | 1  | 2   | 9   | 0   | 3706 | 3706 | 3697 |
|           | 2008 | 1  | N1 | 105 | 10.7 | 0.88 | 12.0  | 26.5  | 39.3  | 25  | 8  | 49  | 83  | 75  | 3847 | 3772 | 3689 |
|           | 2008 | 1  | N2 | 210 | 11.0 | 1.62 | 32.1  | 51.7  | 85.4  | 54  | 20 | 98  | 172 | 149 | 3943 | 3794 | 3622 |
|           | 2008 | 1  | N3 | 315 | 10.9 | 2.98 | 86.2  | 76.9  | 166.0 | 90  | 41 | 147 | 278 | 224 | 3904 | 3680 | 3402 |
|           | 2008 | 1  | N4 | 420 | 10.6 | 5.49 | 231.2 | 102.1 | 338.8 | 138 | 85 | 197 | 420 | 298 | 3815 | 3517 | 3097 |
|           | 2008 | 2  | N0 | 0   | 3.6  | 0.48 | 4.5   | 1.3   | 6.2   | 5   | 1  | 2   | 9   | 0   | 1283 | 1283 | 1274 |
|           | 2008 | 2  | N1 | 120 | 6.0  | 0.96 | 13.8  | 30.1  | 44.8  | 29  | 10 | 56  | 95  | 85  | 2168 | 2083 | 1988 |
|           | 2008 | 2  | N2 | 240 | 7.4  | 1.93 | 42.6  | 58.9  | 103.4 | 63  | 25 | 112 | 200 | 171 | 2664 | 2494 | 2294 |
|           | 2008 | 2  | N3 | 360 | 7.5  | 3.87 | 131.5 | 87.7  | 223.1 | 108 | 55 | 169 | 332 | 256 | 2709 | 2453 | 2121 |
|           | 2008 | 2  | N4 | 480 | 6.8  | 7.77 | 218.8 | 116.5 | 343.1 | 175 | 85 | 225 | 485 | 341 | 2445 | 2104 | 1619 |
|           | 2008 | 3  | N0 | 0   | 5.8  | 0.48 | 4.5   | 1.3   | 6.2   | 5   | 1  | 2   | 9   | 0   | 2098 | 2098 | 2089 |

---

|      |   |    |     |     |      |       |       |       |     |    |     |     |     |      |      |      |
|------|---|----|-----|-----|------|-------|-------|-------|-----|----|-----|-----|-----|------|------|------|
| 2008 | 3 | N1 | 120 | 7.6 | 0.96 | 13.8  | 30.1  | 44.8  | 29  | 10 | 56  | 95  | 85  | 2733 | 2648 | 2553 |
| 2008 | 3 | N2 | 240 | 9.1 | 1.93 | 42.6  | 58.9  | 103.4 | 63  | 25 | 112 | 200 | 171 | 3255 | 3085 | 2884 |
| 2008 | 3 | N3 | 360 | 9.1 | 3.87 | 131.5 | 87.7  | 223.1 | 108 | 55 | 169 | 332 | 256 | 3282 | 3026 | 2694 |
| 2008 | 3 | N4 | 480 | 7.6 | 7.77 | 218.8 | 116.5 | 343.1 | 175 | 85 | 225 | 485 | 341 | 2742 | 2401 | 1916 |
| 2008 | 4 | N0 | 0   | 5.1 | 0.48 | 4.5   | 1.3   | 6.2   | 5   | 1  | 2   | 9   | 0   | 1845 | 1845 | 1836 |
| 2008 | 4 | N1 | 120 | 6.7 | 0.96 | 13.8  | 30.1  | 44.8  | 29  | 10 | 56  | 95  | 85  | 2400 | 2315 | 2220 |
| 2008 | 4 | N2 | 240 | 9.3 | 1.93 | 42.6  | 58.9  | 103.4 | 63  | 25 | 112 | 200 | 171 | 3335 | 3164 | 2964 |
| 2008 | 4 | N3 | 360 | 9.0 | 3.87 | 131.5 | 87.7  | 223.1 | 108 | 55 | 169 | 332 | 256 | 3243 | 2987 | 2655 |
| 2008 | 4 | N4 | 480 | 7.6 | 7.77 | 218.8 | 116.5 | 343.1 | 175 | 85 | 225 | 485 | 341 | 2734 | 2393 | 1908 |
| 2008 | 5 | N0 | 0   | 4.6 | 0.48 | 4.5   | 1.3   | 6.2   | 5   | 1  | 2   | 9   | 0   | 1666 | 1666 | 1657 |
| 2008 | 5 | N1 | 120 | 6.1 | 0.96 | 13.8  | 30.1  | 44.8  | 29  | 10 | 56  | 95  | 85  | 2196 | 2111 | 2016 |
| 2008 | 5 | N2 | 240 | 7.5 | 1.93 | 42.6  | 58.9  | 103.4 | 63  | 25 | 112 | 200 | 171 | 2703 | 2533 | 2333 |
| 2008 | 5 | N3 | 360 | 7.7 | 3.87 | 131.5 | 87.7  | 223.1 | 108 | 55 | 169 | 332 | 256 | 2768 | 2512 | 2180 |
| 2008 | 5 | N4 | 480 | 7.4 | 7.77 | 218.8 | 116.5 | 343.1 | 175 | 85 | 225 | 485 | 341 | 2674 | 2333 | 1848 |
| 2008 | 6 | N0 | 0   | 4.3 | 0.48 | 4.5   | 1.3   | 6.2   | 5   | 1  | 2   | 9   | 0   | 1563 | 1563 | 1554 |
| 2008 | 6 | N1 | 120 | 6.6 | 0.96 | 13.8  | 30.1  | 44.8  | 29  | 10 | 56  | 95  | 85  | 2355 | 2270 | 2175 |
| 2008 | 6 | N2 | 240 | 8.1 | 1.93 | 42.6  | 58.9  | 103.4 | 63  | 25 | 112 | 200 | 171 | 2907 | 2736 | 2536 |
| 2008 | 6 | N3 | 360 | 8.1 | 3.87 | 131.5 | 87.7  | 223.1 | 108 | 55 | 169 | 332 | 256 | 2926 | 2671 | 2338 |
| 2008 | 6 | N4 | 480 | 7.4 | 7.77 | 218.8 | 116.5 | 343.1 | 175 | 85 | 225 | 485 | 341 | 2671 | 2330 | 1845 |
| 2009 | 7 | N0 | 0   | 7.5 | 0.48 | 4.5   | 1.3   | 6.2   | 5   | 1  | 2   | 9   | 0   | 2679 | 2679 | 2669 |
| 2009 | 7 | N1 | 120 | 8.7 | 0.96 | 13.8  | 30.1  | 44.8  | 29  | 10 | 56  | 95  | 85  | 3128 | 3043 | 2948 |

---



---

|      |   |    |     |     |      |       |       |       |     |    |     |     |     |      |      |      |
|------|---|----|-----|-----|------|-------|-------|-------|-----|----|-----|-----|-----|------|------|------|
| 2009 | 7 | N2 | 240 | 9.1 | 1.93 | 42.6  | 58.9  | 103.4 | 63  | 25 | 112 | 200 | 171 | 3263 | 3092 | 2892 |
| 2009 | 7 | N3 | 360 | 8.6 | 3.87 | 131.5 | 87.7  | 223.1 | 108 | 55 | 169 | 332 | 256 | 3101 | 2845 | 2513 |
| 2009 | 7 | N4 | 480 | 7.6 | 7.77 | 218.8 | 116.5 | 343.1 | 175 | 85 | 225 | 485 | 341 | 2748 | 2407 | 1922 |

---

**Supplementary Table 2.** N rate (kg N/ha), control yield (Mg/ha), grain yield (Mg/ha), Nr losses intensity (kg N/Mg grain yield) of fertilizer N use, environmental costs of N fertilizer production and use, economic benefit and net benefit (\$/ha) with agronomically, economically and agronomically optimal N rate over 91 sites in 12 counties in Henan province for maize production in China from 2008 to 2009. F, C and R indicate fluvo aquic soil, cinnamon soil and red clay, respectively.

| City                           | Year | Site | Soil type | Control yield | N rate | Grain yield | Economic benefit | Net benefit | Environmental costs |      |       |       | Nr losses intensity |          |                 |       |
|--------------------------------|------|------|-----------|---------------|--------|-------------|------------------|-------------|---------------------|------|-------|-------|---------------------|----------|-----------------|-------|
|                                |      |      |           |               |        |             |                  |             | Cgw                 | Ceu  | Cacid | Total | N <sub>2</sub> O    | Leaching | NH <sub>3</sub> | Total |
| <b>Agronomically optimal N</b> |      |      |           |               |        |             |                  |             |                     |      |       |       |                     |          |                 |       |
| Hebei                          | 2008 | 1    | F         | 9.4           | 234.5  | 10.0        | 45.9             | -151.0      | 66.7                | 25.3 | 112.2 | 204.2 | 0.2                 | 4.0      | 5.8             | 10.0  |
|                                | 2008 | 2    | F         | 6.5           | 283.8  | 8.6         | 561.9            | 313.8       | 83.3                | 34.6 | 135.3 | 253.1 | 0.3                 | 7.5      | 8.1             | 15.8  |
|                                | 2008 | 3    | F         | 8.1           | 320.2  | 9.5         | 268.2            | -19.9       | 96.9                | 43.7 | 152.4 | 293.0 | 0.3                 | 9.6      | 8.3             | 18.2  |
|                                | 2008 | 4    | F         | 9.1           | 351.2  | 10.8        | 346.6            | 23.1        | 109.7               | 53.5 | 166.8 | 330.1 | 0.3                 | 11.2     | 7.9             | 19.5  |
|                                | 2009 | 5    | F         | 6.7           | 319.0  | 8.3         | 353.6            | 67.0        | 96.4                | 43.3 | 151.8 | 291.5 | 0.4                 | 10.7     | 9.3             | 20.4  |
|                                | 2009 | 6    | F         | 8.8           | 306.7  | 10.4        | 358.0            | 85.0        | 91.7                | 40.0 | 146.0 | 277.7 | 0.3                 | 7.7      | 7.2             | 15.2  |
|                                | 2009 | 7    | F         | 8.0           | 310.0  | 10.0        | 480.7            | 204.3       | 93.0                | 40.8 | 147.6 | 281.4 | 0.3                 | 8.2      | 7.6             | 16.1  |

|         |      |    |   |      |       |      |        |        |       |      |       |       |     |      |      |      |
|---------|------|----|---|------|-------|------|--------|--------|-------|------|-------|-------|-----|------|------|------|
|         | 2009 | 8  | F | 7.7  | 318.3 | 10.1 | 622.7  | 336.8  | 96.2  | 43.1 | 151.4 | 290.7 | 0.3 | 8.8  | 7.7  | 16.9 |
|         | 2009 | 9  | F | 7.5  | 305.0 | 9.9  | 646.4  | 375.2  | 91.1  | 39.6 | 145.2 | 275.9 | 0.3 | 7.9  | 7.5  | 15.8 |
|         | 2009 | 10 | F | 7.3  | 332.2 | 9.7  | 607.3  | 305.7  | 101.7 | 47.2 | 158.0 | 306.9 | 0.3 | 10.5 | 8.4  | 19.2 |
|         | 2009 | 11 | F | 7.1  | 300.3 | 9.6  | 662.4  | 396.4  | 89.3  | 38.4 | 143.0 | 270.7 | 0.3 | 7.8  | 7.7  | 15.8 |
| Jiaozuo | 2008 | 1  | F | 9.3  | 202.5 | 9.9  | 79.8   | -85.6  | 56.9  | 20.6 | 97.2  | 174.8 | 0.2 | 3.0  | 5.0  | 8.2  |
|         | 2008 | 2  | F | 9.7  | 295.2 | 11.0 | 273.3  | 12.9   | 87.4  | 37.2 | 140.6 | 265.2 | 0.2 | 6.5  | 6.5  | 13.2 |
|         | 2008 | 3  | F | 8.0  | 277.9 | 11.3 | 985.8  | 744.2  | 81.2  | 33.3 | 132.5 | 247.0 | 0.2 | 5.4  | 6.0  | 11.6 |
|         | 2008 | 4  | F | 10.8 | 242.0 | 12.0 | 237.4  | 34.8   | 69.1  | 26.5 | 115.7 | 211.4 | 0.2 | 3.6  | 5.0  | 8.8  |
|         | 2008 | 5  | F | 8.1  | 257.4 | 9.8  | 501.4  | 276.7  | 74.2  | 29.3 | 122.9 | 226.4 | 0.2 | 5.1  | 6.5  | 11.8 |
|         | 2008 | 6  | F | 7.7  | 280.1 | 10.2 | 685.4  | 444.4  | 82.0  | 33.8 | 133.6 | 249.3 | 0.2 | 6.1  | 6.7  | 13.0 |
|         | 2009 | 7  | F | 7.8  | 262.7 | 8.7  | 142.0  | -83.7  | 75.9  | 30.2 | 125.4 | 231.6 | 0.3 | 6.0  | 7.4  | 13.7 |
|         | 2009 | 8  | F | 8.3  | 206.5 | 8.8  | 56.4   | -113.0 | 58.1  | 21.1 | 99.1  | 178.4 | 0.2 | 3.5  | 5.8  | 9.5  |
|         | 2009 | 9  | F | 8.5  | 219.0 | 9.4  | 167.8  | -13.6  | 61.9  | 22.9 | 105.0 | 189.8 | 0.2 | 3.7  | 5.7  | 9.6  |
|         | 2009 | 10 | F | 7.1  | 252.0 | 8.7  | 387.9  | 173.3  | 72.4  | 28.3 | 120.4 | 221.0 | 0.2 | 5.5  | 7.1  | 12.8 |
|         | 2009 | 11 | C | 3.2  | 249.7 | 5.9  | 787.9  | 577.6  | 71.6  | 27.9 | 119.3 | 218.8 | 0.3 | 7.9  | 10.4 | 18.7 |
|         | 2009 | 12 | F | 3.4  | 248.2 | 6.7  | 1017.9 | 802.9  | 71.1  | 27.6 | 118.7 | 217.4 | 0.3 | 6.9  | 9.1  | 16.3 |

|         |      |    |   |     |       |      |       |       |       |      |       |       |     |      |      |      |
|---------|------|----|---|-----|-------|------|-------|-------|-------|------|-------|-------|-----|------|------|------|
| Kaifeng | 2008 | 1  | F | 6.0 | 301.4 | 9.0  | 862.4 | 595.3 | 89.7  | 64.9 | 143.5 | 298.1 | 0.3 | 19.6 | 8.2  | 28.1 |
|         | 2008 | 2  | F | 7.9 | 271.4 | 9.5  | 350.9 | 123.4 | 78.9  | 31.9 | 129.5 | 240.4 | 0.2 | 6.0  | 7.0  | 13.3 |
|         | 2008 | 3  | F | 6.4 | 306.8 | 8.6  | 568.4 | 295.2 | 91.8  | 40.0 | 146.1 | 277.9 | 0.3 | 9.3  | 8.7  | 18.3 |
|         | 2008 | 4  | F | 7.7 | 291.2 | 9.0  | 263.2 | 7.2   | 85.9  | 36.2 | 138.8 | 260.9 | 0.3 | 7.6  | 7.9  | 15.8 |
|         | 2008 | 5  | F | 7.0 | 252.0 | 8.0  | 170.3 | -42.4 | 72.4  | 28.3 | 120.4 | 221.1 | 0.3 | 6.0  | 7.7  | 14.0 |
|         | 2008 | 6  | F | 7.3 | 220.0 | 8.4  | 221.4 | 40.0  | 62.2  | 23.1 | 105.5 | 190.8 | 0.2 | 4.2  | 6.5  | 10.9 |
|         | 2008 | 7  | R | 5.8 | 292.4 | 7.7  | 469.3 | 215.5 | 86.4  | 36.5 | 139.3 | 262.3 | 0.3 | 9.1  | 9.3  | 18.8 |
|         | 2009 | 8  | F | 8.4 | 233.0 | 9.2  | 111.8 | -82.1 | 66.2  | 25.1 | 111.5 | 202.8 | 0.2 | 4.3  | 6.2  | 10.8 |
|         | 2009 | 9  | F | 7.2 | 253.6 | 8.6  | 351.4 | 137.2 | 72.9  | 28.6 | 121.2 | 222.7 | 0.2 | 5.6  | 7.2  | 13.1 |
|         | 2009 | 10 | F | 8.2 | 241.8 | 9.4  | 275.1 | 72.6  | 69.1  | 26.5 | 115.7 | 211.2 | 0.2 | 4.6  | 6.3  | 11.1 |
| Luoyang | 2008 | 1  | F | 7.5 | 344.6 | 9.7  | 566.4 | 250.5 | 106.9 | 51.2 | 163.7 | 321.9 | 0.4 | 11.7 | 8.6  | 20.7 |
|         | 2008 | 2  | C | 6.7 | 330.1 | 8.4  | 382.2 | 82.9  | 100.9 | 46.5 | 157.0 | 304.4 | 0.4 | 11.8 | 9.6  | 21.8 |
|         | 2008 | 3  | C | 6.9 | 326.7 | 8.8  | 425.9 | 130.6 | 99.5  | 45.5 | 155.4 | 300.4 | 0.4 | 11.0 | 9.1  | 20.4 |
|         | 2008 | 4  | F | 7.6 | 345.8 | 10.0 | 612.6 | 295.4 | 107.4 | 51.6 | 164.3 | 323.3 | 0.4 | 11.6 | 8.5  | 20.4 |
|         | 2008 | 5  | C | 5.2 | 314.9 | 6.7  | 333.2 | 51.1  | 94.9  | 42.2 | 149.9 | 286.9 | 0.4 | 12.8 | 11.5 | 24.7 |
|         | 2009 | 6  | C | 6.8 | 295.2 | 8.2  | 276.0 | 15.5  | 87.4  | 37.2 | 140.7 | 265.3 | 0.3 | 8.8  | 8.8  | 17.9 |

---

|              |      |    |   |     |       |      |       |        |      |      |       |       |     |      |      |      |
|--------------|------|----|---|-----|-------|------|-------|--------|------|------|-------|-------|-----|------|------|------|
|              | 2009 | 7  | C | 5.5 | 286.9 | 6.6  | 182.3 | -69.2  | 84.4 | 35.2 | 136.8 | 256.4 | 0.4 | 10.0 | 10.6 | 21.0 |
|              | 2009 | 8  | C | 4.6 | 310.2 | 6.4  | 428.7 | 151.8  | 93.0 | 40.9 | 147.7 | 281.6 | 0.5 | 12.9 | 11.9 | 25.3 |
|              | 2009 | 9  | C | 7.0 | 281.6 | 8.6  | 375.1 | 129.3  | 82.5 | 34.1 | 134.3 | 250.9 | 0.3 | 7.3  | 8.0  | 15.5 |
|              | 2009 | 10 | C | 6.9 | 288.4 | 8.5  | 396.0 | 142.9  | 84.9 | 35.6 | 137.5 | 258.0 | 0.3 | 7.9  | 8.3  | 16.4 |
|              | 2009 | 11 | F | 5.6 | 260.9 | 6.8  | 228.5 | 4.6    | 75.4 | 29.9 | 124.6 | 229.9 | 0.3 | 7.7  | 9.4  | 17.4 |
|              | 2009 | 12 | C | 4.7 | 240.5 | 5.8  | 241.9 | 38.9   | 68.6 | 26.3 | 115.0 | 210.0 | 0.3 | 7.3  | 10.1 | 17.7 |
|              | 2009 | 13 | C | 7.9 | 183.4 | 8.9  | 230.4 | 81.3   | 51.4 | 18.1 | 88.3  | 157.8 | 0.2 | 2.8  | 5.1  | 8.0  |
|              | 2009 | 14 | C | 7.8 | 202.1 | 8.4  | 46.2  | -120.4 | 56.8 | 20.6 | 97.1  | 174.4 | 0.2 | 3.6  | 6.0  | 9.7  |
|              | 2009 | 15 | C | 8.9 | 208.8 | 9.7  | 152.6 | -20.4  | 58.8 | 21.5 | 100.2 | 180.4 | 0.2 | 3.3  | 5.3  | 8.7  |
|              | 2009 | 16 | C | 7.8 | 185.7 | 8.8  | 230.0 | 78.7   | 52.0 | 18.4 | 89.4  | 159.9 | 0.2 | 2.9  | 5.2  | 8.3  |
|              | 2009 | 17 | R | 8.4 | 205.7 | 10.1 | 484.8 | 319.0  | 57.9 | 21.0 | 98.7  | 177.7 | 0.2 | 3.0  | 5.0  | 8.2  |
|              | 2009 | 18 | R | 8.6 | 172.6 | 9.1  | 61.1  | -75.2  | 48.3 | 16.8 | 83.2  | 148.4 | 0.1 | 2.5  | 4.7  | 7.3  |
| Nanyang      | 2009 | 1  | R | 6.3 | 268.1 | 7.5  | 252.7 | 21.3   | 77.8 | 31.3 | 127.9 | 237.0 | 0.3 | 7.4  | 8.7  | 16.4 |
|              | 2009 | 2  | R | 6.2 | 265.3 | 6.9  | 56.0  | -172.4 | 76.8 | 30.7 | 126.6 | 234.2 | 0.3 | 7.8  | 9.4  | 17.5 |
|              | 2009 | 3  | R | 5.4 | 310.7 | 7.6  | 536.5 | 259.1  | 93.2 | 41.0 | 147.9 | 282.2 | 0.4 | 10.9 | 10.0 | 21.4 |
| Pingdingshan | 2009 | 1  | C | 3.7 | 298.9 | 5.7  | 526.1 | 261.6  | 88.8 | 38.1 | 142.4 | 269.2 | 0.5 | 12.9 | 12.7 | 26.1 |

---

|            |      |   |   |     |       |     |       |       |       |       |       |       |     |      |      |      |
|------------|------|---|---|-----|-------|-----|-------|-------|-------|-------|-------|-------|-----|------|------|------|
|            | 2009 | 2 | C | 3.8 | 299.0 | 5.9 | 544.7 | 280.1 | 88.8  | 38.1  | 142.4 | 269.4 | 0.5 | 12.5 | 12.4 | 25.4 |
|            | 2009 | 3 | F | 4.8 | 298.7 | 7.5 | 744.5 | 480.3 | 88.7  | 38.0  | 142.3 | 268.9 | 0.4 | 9.9  | 9.8  | 20.1 |
|            | 2009 | 4 | C | 3.2 | 298.6 | 4.9 | 417.5 | 153.4 | 88.6  | 38.0  | 142.2 | 268.8 | 0.6 | 15.0 | 14.8 | 30.4 |
| Shanmenxia | 2009 | 1 | C | 4.5 | 303.9 | 6.6 | 568.6 | 298.7 | 90.6  | 39.3  | 144.7 | 274.6 | 0.4 | 11.7 | 11.2 | 23.3 |
|            | 2009 | 2 | R | 5.6 | 285.5 | 6.9 | 267.9 | 18.0  | 83.9  | 34.9  | 136.1 | 254.9 | 0.4 | 9.4  | 10.1 | 19.9 |
|            | 2009 | 3 | R | 4.3 | 304.9 | 6.4 | 573.1 | 302.1 | 91.0  | 39.5  | 145.2 | 275.7 | 0.4 | 12.2 | 11.6 | 24.2 |
|            | 2009 | 4 | C | 6.1 | 306.1 | 7.2 | 174.5 | -88.5 | 91.5  | 39.8  | 145.7 | 277.0 | 0.4 | 11.1 | 10.4 | 21.9 |
| Shangqiu   | 2009 | 1 | F | 6.8 | 339.7 | 8.7 | 451.9 | 141.7 | 104.9 | 49.6  | 161.5 | 316.0 | 0.4 | 12.5 | 9.5  | 22.5 |
|            | 2009 | 2 | F | 5.9 | 288.3 | 8.8 | 852.4 | 599.5 | 84.9  | 35.6  | 137.4 | 257.8 | 0.3 | 7.6  | 8.0  | 15.9 |
|            | 2009 | 3 | F | 6.7 | 364.7 | 9.2 | 659.1 | 319.7 | 115.7 | 58.6  | 173.2 | 347.5 | 0.4 | 14.9 | 9.7  | 25.0 |
|            | 2009 | 4 | F | 6.3 | 329.4 | 9.0 | 717.5 | 419.1 | 100.6 | 46.3  | 156.6 | 303.6 | 0.4 | 11.0 | 9.0  | 20.3 |
| Xinxiang   | 2008 | 1 | F | 6.8 | 227.9 | 7.6 | 117.7 | -72.6 | 64.7  | 24.3  | 109.1 | 198.0 | 0.2 | 5.0  | 7.4  | 12.6 |
|            | 2008 | 2 | F | 6.4 | 413.6 | 9.4 | 765.9 | 366.7 | 139.9 | 82.6  | 196.1 | 418.5 | 0.6 | 23.2 | 10.7 | 34.6 |
|            | 2009 | 3 | C | 5.6 | 443.0 | 7.6 | 398.2 | -38.3 | 156.6 | 102.4 | 209.8 | 468.8 | 0.8 | 37.6 | 14.1 | 52.5 |
|            | 2009 | 4 | F | 7.1 | 364.4 | 9.5 | 565.8 | 226.6 | 115.6 | 58.5  | 173.1 | 347.2 | 0.4 | 14.5 | 9.4  | 24.3 |
|            | 2009 | 5 | C | 7.7 | 311.5 | 9.5 | 437.3 | 159.0 | 93.5  | 41.2  | 148.3 | 283.0 | 0.3 | 8.8  | 8.0  | 17.1 |

|           |      |    |   |      |       |      |        |        |       |      |       |       |     |      |      |      |
|-----------|------|----|---|------|-------|------|--------|--------|-------|------|-------|-------|-----|------|------|------|
| Zhengzhou | 2009 | 1  | C | 6.1  | 305.3 | 7.8  | 396.8  | 125.4  | 91.2  | 39.6 | 145.4 | 276.2 | 0.4 | 10.1 | 9.5  | 20.0 |
|           | 2009 | 2  | C | 6.1  | 299.7 | 7.0  | 109.5  | -155.8 | 89.1  | 38.2 | 142.8 | 270.1 | 0.4 | 10.7 | 10.5 | 21.6 |
|           | 2009 | 3  | C | 6.1  | 313.7 | 7.8  | 390.9  | 110.1  | 94.4  | 41.8 | 149.3 | 285.5 | 0.4 | 10.9 | 9.8  | 21.1 |
| Zhoukou   | 2008 | 1  | F | 6.8  | 197.2 | 8.6  | 496.9  | 334.0  | 55.4  | 19.9 | 94.7  | 170.0 | 0.2 | 3.3  | 5.6  | 9.1  |
|           | 2008 | 2  | F | 6.3  | 322.2 | 9.1  | 788.5  | 498.2  | 97.7  | 44.2 | 153.3 | 295.2 | 0.3 | 10.1 | 8.6  | 19.1 |
|           | 2008 | 3  | F | 6.0  | 316.1 | 9.3  | 959.6  | 676.2  | 95.3  | 42.5 | 150.4 | 288.2 | 0.3 | 9.4  | 8.3  | 18.0 |
|           | 2008 | 4  | F | 6.8  | 319.6 | 8.7  | 454.5  | 167.1  | 96.7  | 43.5 | 152.1 | 292.2 | 0.4 | 10.4 | 9.0  | 19.7 |
|           | 2008 | 5  | F | 7.5  | 307.5 | 8.4  | 110.0  | -163.9 | 92.0  | 40.2 | 146.4 | 278.6 | 0.3 | 9.6  | 8.9  | 18.8 |
|           | 2009 | 6  | F | 4.6  | 302.8 | 6.8  | 571.9  | 303.1  | 90.2  | 70.5 | 144.2 | 305.0 | 0.4 | 28.9 | 10.8 | 40.2 |
|           | 2009 | 7  | F | 4.1  | 324.0 | 6.5  | 608.4  | 316.1  | 98.4  | 44.7 | 154.1 | 297.3 | 0.5 | 14.5 | 12.2 | 27.2 |
|           | 2009 | 8  | F | 4.4  | 324.2 | 6.6  | 568.4  | 275.8  | 98.5  | 44.8 | 154.2 | 297.6 | 0.5 | 14.2 | 12.0 | 26.7 |
|           | 2009 | 9  | F | 4.2  | 321.0 | 7.1  | 805.5  | 516.5  | 97.2  | 43.9 | 152.7 | 293.8 | 0.4 | 12.8 | 11.0 | 24.2 |
|           | 2009 | 10 | F | 8.6  | 404.3 | 10.0 | 202.4  | -185.1 | 134.9 | 77.2 | 191.7 | 403.9 | 0.5 | 20.0 | 9.9  | 30.3 |
| Zhumadian | 2008 | 1  | F | 10.3 | 243.8 | 10.9 | 53.9   | -150.3 | 69.7  | 26.8 | 116.6 | 213.1 | 0.2 | 4.0  | 5.5  | 9.7  |
|           | 2008 | 2  | R | 3.6  | 327.5 | 7.7  | 1236.2 | 939.8  | 99.9  | 45.8 | 155.8 | 301.4 | 0.4 | 12.7 | 10.4 | 23.5 |
|           | 2008 | 3  | R | 5.8  | 293.1 | 9.1  | 952.0  | 693.9  | 86.6  | 36.7 | 139.7 | 263.0 | 0.3 | 7.7  | 7.9  | 15.9 |

|       |                               |    |   |     |       |      |        |       |       |      |       |       |     |      |      |      |
|-------|-------------------------------|----|---|-----|-------|------|--------|-------|-------|------|-------|-------|-----|------|------|------|
|       | 2008                          | 4  | R | 5.1 | 308.9 | 9.0  | 1157.3 | 881.9 | 92.5  | 40.6 | 147.0 | 280.1 | 0.3 | 9.1  | 8.4  | 17.8 |
|       | 2008                          | 5  | F | 4.6 | 369.8 | 7.7  | 851.7  | 506.2 | 118.1 | 60.7 | 175.6 | 354.3 | 0.5 | 18.7 | 11.7 | 30.9 |
|       | 2008                          | 6  | C | 4.3 | 329.1 | 8.2  | 1164.6 | 866.5 | 100.5 | 64.8 | 156.5 | 321.8 | 0.4 | 20.6 | 9.7  | 30.7 |
|       | 2009                          | 7  | F | 7.5 | 245.8 | 9.1  | 400.8  | 192.5 | 70.4  | 27.2 | 117.5 | 215.1 | 0.2 | 5.0  | 6.7  | 11.8 |
|       | <b>Economically optimal N</b> |    |   |     |       |      |        |       |       |      |       |       |     |      |      |      |
| Hebei | 2008                          | 1  | F | 9.4 | 142.3 | 9.9  | 79.0   | -31.3 | 40.1  | 13.5 | 69.1  | 122.7 | 0.1 | 1.7  | 3.6  | 5.4  |
|       | 2008                          | 2  | F | 6.5 | 246.1 | 8.6  | 575.3  | 366.7 | 70.5  | 27.2 | 117.6 | 215.3 | 0.2 | 5.3  | 7.0  | 12.5 |
|       | 2008                          | 3  | F | 8.1 | 247.4 | 9.4  | 293.7  | 83.8  | 70.9  | 27.5 | 118.2 | 216.6 | 0.2 | 4.9  | 6.5  | 11.5 |
|       | 2008                          | 4  | F | 9.1 | 278.4 | 10.7 | 372.0  | 129.7 | 81.4  | 33.4 | 132.8 | 247.6 | 0.2 | 5.7  | 6.4  | 12.3 |
|       | 2009                          | 5  | F | 6.7 | 255.1 | 8.3  | 377.3  | 159.5 | 73.4  | 28.8 | 121.8 | 224.1 | 0.3 | 5.9  | 7.5  | 13.7 |
|       | 2009                          | 6  | F | 8.8 | 249.0 | 10.3 | 378.3  | 166.7 | 71.4  | 27.7 | 119.0 | 218.2 | 0.2 | 4.5  | 5.9  | 10.6 |
|       | 2009                          | 7  | F | 8.0 | 261.2 | 9.9  | 498.1  | 274.0 | 75.5  | 30.0 | 124.7 | 230.1 | 0.2 | 5.2  | 6.4  | 11.9 |
|       | 2009                          | 8  | F | 7.7 | 277.0 | 10.0 | 636.9  | 396.0 | 80.9  | 33.1 | 132.1 | 246.1 | 0.2 | 6.0  | 6.8  | 13.0 |
|       | 2009                          | 9  | F | 7.5 | 267.7 | 9.8  | 659.2  | 428.2 | 77.6  | 31.2 | 127.8 | 236.6 | 0.2 | 5.6  | 6.7  | 12.5 |
|       | 2009                          | 10 | F | 7.3 | 286.4 | 9.6  | 623.3  | 372.5 | 84.2  | 35.1 | 136.5 | 255.8 | 0.3 | 6.8  | 7.3  | 14.4 |
|       | 2009                          | 11 | F | 7.1 | 263.8 | 9.5  | 675.3  | 448.3 | 76.3  | 30.5 | 126.0 | 232.8 | 0.2 | 5.6  | 6.8  | 12.6 |



|         |      |    |   |      |       |      |        |       |      |      |       |       |     |     |     |      |
|---------|------|----|---|------|-------|------|--------|-------|------|------|-------|-------|-----|-----|-----|------|
| Jiaozuo | 2008 | 1  | F | 9.3  | 137.7 | 9.9  | 102.5  | -3.9  | 38.8 | 13.1 | 66.9  | 118.8 | 0.1 | 1.6 | 3.5 | 5.2  |
|         | 2008 | 2  | F | 9.7  | 230.3 | 11.0 | 296.9  | 104.3 | 65.4 | 24.6 | 110.2 | 200.3 | 0.2 | 3.5 | 5.2 | 8.9  |
|         | 2008 | 3  | F | 8.0  | 254.9 | 11.3 | 993.9  | 776.3 | 73.3 | 28.8 | 121.8 | 223.9 | 0.2 | 4.3 | 5.5 | 10.0 |
|         | 2008 | 4  | F | 10.8 | 190.1 | 11.9 | 256.6  | 103.2 | 53.3 | 19.0 | 91.4  | 163.7 | 0.1 | 2.2 | 3.9 | 6.3  |
|         | 2008 | 5  | F | 8.1  | 238.1 | 9.8  | 504.7  | 300.1 | 67.9 | 25.9 | 113.9 | 207.7 | 0.2 | 4.3 | 6.0 | 10.5 |
|         | 2008 | 6  | F | 7.7  | 248.3 | 10.2 | 696.8  | 487.8 | 71.2 | 27.6 | 118.7 | 217.5 | 0.2 | 4.5 | 6.0 | 10.7 |
|         | 2009 | 7  | F | 7.8  | 187.6 | 8.6  | 169.0  | 17.6  | 52.6 | 18.7 | 90.3  | 161.5 | 0.2 | 3.0 | 5.4 | 8.5  |
|         | 2009 | 8  | F | 8.3  | 131.7 | 8.7  | 83.3   | -17.8 | 37.3 | 12.4 | 64.1  | 113.8 | 0.1 | 1.8 | 3.8 | 5.6  |
|         | 2009 | 9  | F | 8.5  | 166.7 | 9.4  | 186.2  | 54.1  | 46.7 | 16.2 | 80.5  | 143.3 | 0.1 | 2.3 | 4.4 | 6.8  |
|         | 2009 | 10 | F | 7.1  | 212.5 | 8.7  | 401.8  | 226.7 | 59.9 | 22.0 | 101.9 | 183.8 | 0.2 | 3.8 | 6.0 | 10.0 |
|         | 2009 | 11 | C | 3.2  | 226.6 | 5.9  | 796.1  | 608.4 | 64.3 | 24.1 | 108.5 | 196.9 | 0.3 | 6.4 | 9.5 | 16.2 |
|         | 2009 | 12 | F | 3.4  | 230.3 | 6.7  | 1024.1 | 827.4 | 65.4 | 24.7 | 110.3 | 200.4 | 0.3 | 5.8 | 8.5 | 14.6 |
| Kaifeng | 2008 | 1  | F | 6.0  | 271.9 | 9.0  | 872.6  | 637.2 | 79.1 | 32.1 | 129.8 | 240.9 | 0.3 | 6.4 | 7.4 | 14.1 |
|         | 2008 | 2  | F | 7.9  | 221.9 | 9.4  | 369.2  | 189.8 | 62.8 | 23.4 | 106.3 | 192.5 | 0.2 | 3.8 | 5.8 | 9.8  |
|         | 2008 | 3  | F | 6.4  | 263.7 | 8.6  | 584.0  | 357.3 | 76.3 | 30.4 | 125.9 | 232.6 | 0.3 | 6.2 | 7.5 | 14.0 |
|         | 2008 | 4  | F | 7.7  | 226.3 | 8.9  | 286.8  | 98.1  | 64.2 | 24.0 | 108.4 | 196.6 | 0.2 | 4.2 | 6.2 | 10.6 |

|         |      |    |   |     |       |     |       |       |      |      |       |       |     |     |      |      |
|---------|------|----|---|-----|-------|-----|-------|-------|------|------|-------|-------|-----|-----|------|------|
|         | 2008 | 5  | F | 7.0 | 187.4 | 7.9 | 193.2 | 42.3  | 52.5 | 18.6 | 90.2  | 161.4 | 0.2 | 3.3 | 5.9  | 9.3  |
|         | 2008 | 6  | F | 7.3 | 174.5 | 8.3 | 237.6 | 98.4  | 48.9 | 17.1 | 84.1  | 150.1 | 0.2 | 2.8 | 5.2  | 8.1  |
|         | 2008 | 7  | R | 5.8 | 247.8 | 7.6 | 485.0 | 276.6 | 71.0 | 27.5 | 118.4 | 217.0 | 0.3 | 6.0 | 8.0  | 14.3 |
|         | 2009 | 8  | F | 8.4 | 163.5 | 9.1 | 136.4 | 7.1   | 45.8 | 15.8 | 79.0  | 140.6 | 0.1 | 2.3 | 4.4  | 6.9  |
|         | 2009 | 9  | F | 7.2 | 211.3 | 8.6 | 366.1 | 193.0 | 59.6 | 21.8 | 101.4 | 182.7 | 0.2 | 3.8 | 6.1  | 10.0 |
|         | 2009 | 10 | F | 8.2 | 195.8 | 9.4 | 291.3 | 132.7 | 55.0 | 19.7 | 94.1  | 168.7 | 0.2 | 3.0 | 5.2  | 8.3  |
| Luoyang | 2008 | 1  | F | 7.5 | 291.4 | 9.7 | 585.9 | 329.6 | 86.0 | 36.3 | 138.9 | 261.1 | 0.3 | 7.1 | 7.4  | 14.7 |
|         | 2008 | 2  | C | 6.7 | 266.6 | 8.3 | 405.1 | 175.3 | 77.3 | 31.0 | 127.3 | 235.5 | 0.3 | 6.6 | 7.8  | 14.7 |
|         | 2008 | 3  | C | 6.9 | 268.5 | 8.7 | 446.9 | 215.1 | 77.9 | 31.4 | 128.1 | 237.4 | 0.3 | 6.4 | 7.6  | 14.2 |
|         | 2008 | 4  | F | 7.6 | 295.9 | 9.9 | 630.5 | 369.3 | 87.7 | 37.3 | 141.0 | 266.0 | 0.3 | 7.3 | 7.3  | 14.8 |
|         | 2008 | 5  | C | 5.2 | 251.9 | 6.7 | 355.4 | 140.9 | 72.4 | 28.3 | 120.4 | 221.0 | 0.3 | 7.2 | 9.3  | 16.8 |
|         | 2009 | 6  | C | 6.8 | 232.6 | 8.1 | 297.5 | 102.6 | 66.1 | 25.0 | 111.3 | 202.5 | 0.2 | 4.9 | 7.1  | 12.2 |
|         | 2009 | 7  | C | 5.5 | 209.6 | 6.5 | 210.9 | 38.6  | 59.1 | 21.6 | 100.6 | 181.2 | 0.2 | 4.9 | 7.9  | 13.1 |
|         | 2009 | 8  | C | 4.6 | 258.2 | 6.3 | 446.8 | 225.7 | 74.5 | 29.4 | 123.3 | 227.2 | 0.3 | 8.0 | 10.0 | 18.3 |
|         | 2009 | 9  | C | 7.0 | 233.3 | 8.6 | 391.9 | 196.2 | 66.4 | 25.1 | 111.7 | 203.1 | 0.2 | 4.6 | 6.7  | 11.5 |
|         | 2009 | 10 | C | 6.9 | 238.2 | 8.5 | 414.4 | 213.7 | 67.9 | 25.9 | 114.0 | 207.8 | 0.2 | 4.9 | 6.9  | 12.0 |

|              |      |    |   |     |       |      |       |       |      |      |       |       |     |     |      |      |
|--------------|------|----|---|-----|-------|------|-------|-------|------|------|-------|-------|-----|-----|------|------|
|              | 2009 | 11 | F | 5.6 | 203.4 | 6.7  | 248.3 | 81.9  | 57.2 | 20.7 | 97.7  | 175.6 | 0.2 | 4.5 | 7.5  | 12.2 |
|              | 2009 | 12 | C | 4.7 | 191.1 | 5.8  | 259.2 | 104.6 | 53.6 | 19.1 | 91.9  | 164.6 | 0.3 | 4.6 | 8.1  | 13.0 |
|              | 2009 | 13 | C | 7.9 | 150.4 | 8.9  | 242.1 | 122.7 | 42.2 | 14.4 | 72.9  | 129.5 | 0.1 | 2.1 | 4.2  | 6.4  |
|              | 2009 | 14 | C | 7.8 | 125.4 | 8.3  | 73.9  | -23.7 | 35.6 | 11.8 | 61.1  | 108.6 | 0.1 | 1.8 | 3.8  | 5.7  |
|              | 2009 | 15 | C | 8.9 | 157.3 | 9.7  | 170.8 | 45.3  | 44.1 | 15.1 | 76.1  | 135.3 | 0.1 | 2.0 | 4.0  | 6.2  |
|              | 2009 | 16 | C | 7.8 | 151.8 | 8.8  | 242.0 | 121.4 | 42.6 | 14.5 | 73.5  | 130.6 | 0.1 | 2.1 | 4.3  | 6.5  |
|              | 2009 | 17 | R | 8.4 | 181.4 | 10.1 | 493.7 | 349.6 | 50.8 | 17.9 | 87.4  | 156.1 | 0.1 | 2.4 | 4.4  | 7.0  |
|              | 2009 | 18 | R | 8.6 | 114.8 | 9.0  | 81.8  | -5.6  | 32.9 | 10.8 | 56.2  | 99.9  | 0.1 | 1.5 | 3.2  | 4.7  |
| Nanyang      | 2009 | 1  | R | 6.3 | 210.1 | 7.5  | 273.6 | 100.8 | 59.2 | 21.6 | 100.8 | 181.6 | 0.2 | 4.3 | 6.9  | 11.4 |
|              | 2009 | 2  | R | 6.2 | 162.8 | 6.8  | 92.7  | -35.8 | 45.6 | 15.7 | 78.6  | 140.0 | 0.2 | 3.0 | 5.9  | 9.1  |
|              | 2009 | 3  | R | 5.4 | 264.6 | 7.5  | 553.3 | 325.5 | 76.6 | 30.6 | 126.3 | 233.6 | 0.3 | 7.1 | 8.6  | 16.1 |
| Pingdingshan | 2009 | 1  | C | 3.7 | 256.8 | 5.7  | 540.7 | 321.1 | 74.0 | 29.1 | 122.6 | 225.8 | 0.4 | 8.8 | 11.1 | 20.2 |
|              | 2009 | 2  | C | 3.8 | 256.7 | 5.9  | 560.0 | 340.5 | 73.9 | 29.1 | 122.6 | 225.7 | 0.4 | 8.5 | 10.7 | 19.6 |
|              | 2009 | 3  | F | 4.8 | 265.8 | 7.4  | 756.0 | 527.0 | 77.0 | 30.8 | 126.9 | 234.7 | 0.3 | 7.3 | 8.8  | 16.4 |
|              | 2009 | 4  | C | 3.2 | 247.7 | 4.9  | 435.8 | 225.5 | 71.0 | 27.5 | 118.4 | 216.9 | 0.4 | 9.4 | 12.5 | 22.3 |
| Shanmenxia   | 2009 | 1  | C | 4.5 | 263.3 | 6.6  | 582.5 | 356.1 | 76.2 | 30.4 | 125.7 | 232.3 | 0.3 | 8.0 | 9.8  | 18.1 |

|           |      |   |   |     |       |     |       |       |       |      |       |       |     |      |      |      |
|-----------|------|---|---|-----|-------|-----|-------|-------|-------|------|-------|-------|-----|------|------|------|
|           | 2009 | 2 | R | 5.6 | 223.6 | 6.9 | 290.1 | 104.0 | 63.3  | 23.6 | 107.1 | 194.1 | 0.3 | 5.3  | 8.0  | 13.6 |
|           | 2009 | 3 | R | 4.3 | 264.3 | 6.4 | 586.9 | 359.5 | 76.5  | 30.6 | 126.2 | 233.3 | 0.3 | 8.4  | 10.1 | 18.8 |
|           | 2009 | 4 | C | 6.1 | 219.3 | 7.1 | 206.8 | 29.8  | 62.0  | 23.0 | 105.1 | 190.1 | 0.2 | 5.0  | 7.6  | 12.8 |
| Shangqiu  | 2009 | 1 | F | 6.8 | 280.7 | 8.6 | 472.8 | 228.0 | 82.2  | 33.9 | 133.9 | 249.9 | 0.3 | 7.2  | 8.0  | 15.5 |
|           | 2009 | 2 | F | 5.9 | 259.6 | 8.8 | 862.9 | 640.3 | 74.9  | 29.7 | 124.0 | 228.6 | 0.2 | 5.8  | 7.2  | 13.3 |
|           | 2009 | 3 | F | 6.7 | 313.3 | 9.2 | 677.3 | 397.0 | 94.2  | 41.7 | 149.1 | 285.1 | 0.3 | 9.3  | 8.4  | 17.9 |
|           | 2009 | 4 | F | 6.3 | 289.9 | 8.9 | 731.1 | 476.4 | 85.5  | 35.9 | 138.1 | 259.5 | 0.3 | 7.6  | 7.9  | 15.8 |
| Xinxiang  | 2008 | 1 | F | 6.8 | 161.8 | 7.5 | 141.3 | 13.7  | 45.3  | 15.6 | 78.2  | 139.1 | 0.2 | 2.7  | 5.3  | 8.2  |
|           | 2008 | 2 | F | 6.4 | 358.6 | 9.3 | 784.3 | 452.1 | 113.0 | 56.3 | 170.3 | 339.6 | 0.4 | 13.9 | 9.4  | 23.7 |
|           | 2009 | 3 | C | 5.6 | 343.0 | 7.5 | 435.2 | 121.2 | 106.2 | 50.7 | 163.0 | 319.9 | 0.5 | 14.9 | 11.1 | 26.4 |
|           | 2009 | 4 | F | 7.1 | 305.4 | 9.4 | 587.7 | 316.1 | 91.2  | 39.7 | 145.4 | 276.3 | 0.3 | 8.4  | 7.9  | 16.6 |
|           | 2009 | 5 | C | 7.7 | 259.0 | 9.5 | 456.0 | 234.2 | 74.7  | 29.5 | 123.7 | 227.9 | 0.2 | 5.4  | 6.7  | 12.3 |
| Zhengzhou | 2009 | 1 | C | 6.1 | 252.6 | 7.8 | 414.8 | 199.5 | 72.6  | 28.4 | 120.7 | 221.7 | 0.3 | 6.2  | 8.0  | 14.4 |
|           | 2009 | 2 | C | 6.1 | 200.6 | 6.9 | 144.9 | -18.8 | 56.4  | 20.3 | 96.4  | 173.1 | 0.2 | 4.3  | 7.2  | 11.7 |
|           | 2009 | 3 | C | 6.1 | 257.3 | 7.8 | 410.6 | 190.4 | 74.2  | 29.2 | 122.9 | 226.3 | 0.3 | 6.5  | 8.1  | 14.9 |
| Zhoukou   | 2008 | 1 | F | 6.8 | 175.4 | 8.6 | 504.7 | 361.3 | 49.1  | 17.2 | 84.6  | 150.9 | 0.2 | 2.7  | 5.1  | 7.9  |

|           |      |    |   |      |       |      |        |       |      |      |       |       |     |      |      |      |
|-----------|------|----|---|------|-------|------|--------|-------|------|------|-------|-------|-----|------|------|------|
|           | 2008 | 2  | F | 6.3  | 284.7 | 9.1  | 802.4  | 553.4 | 83.6 | 34.8 | 135.7 | 254.1 | 0.3 | 7.1  | 7.7  | 15.1 |
|           | 2008 | 3  | F | 6.0  | 286.7 | 9.2  | 969.8  | 718.6 | 84.3 | 35.2 | 136.7 | 256.2 | 0.3 | 7.1  | 7.6  | 15.0 |
|           | 2008 | 4  | F | 6.8  | 265.9 | 8.6  | 473.8  | 244.7 | 77.1 | 30.9 | 126.9 | 234.9 | 0.3 | 6.3  | 7.6  | 14.1 |
|           | 2008 | 5  | F | 7.5  | 204.8 | 8.3  | 146.8  | -20.9 | 57.6 | 20.9 | 98.3  | 176.9 | 0.2 | 3.7  | 6.1  | 10.0 |
|           | 2009 | 6  | F | 4.6  | 261.2 | 6.8  | 586.8  | 362.6 | 75.5 | 30.0 | 124.7 | 230.1 | 0.3 | 7.7  | 9.4  | 17.4 |
|           | 2009 | 7  | F | 4.1  | 280.8 | 6.4  | 623.1  | 378.2 | 82.2 | 33.9 | 133.9 | 250.1 | 0.4 | 9.7  | 10.7 | 20.8 |
|           | 2009 | 8  | F | 4.4  | 279.0 | 6.6  | 583.8  | 340.8 | 81.6 | 33.5 | 133.1 | 248.2 | 0.4 | 9.4  | 10.4 | 20.1 |
|           | 2009 | 9  | F | 4.2  | 284.7 | 7.1  | 818.7  | 569.7 | 83.6 | 34.8 | 135.7 | 254.1 | 0.4 | 9.2  | 9.8  | 19.3 |
|           | 2009 | 10 | F | 8.6  | 288.5 | 9.9  | 241.3  | -11.8 | 85.0 | 35.6 | 137.5 | 258.0 | 0.3 | 6.8  | 7.1  | 14.2 |
| Zhumadian | 2008 | 1  | F | 10.3 | 151.0 | 10.8 | 86.6   | -28.6 | 42.4 | 14.4 | 73.1  | 129.9 | 0.1 | 1.7  | 3.5  | 5.3  |
|           | 2008 | 2  | R | 3.6  | 301.5 | 7.6  | 1245.5 | 978.1 | 89.8 | 38.7 | 143.6 | 272.0 | 0.4 | 9.9  | 9.7  | 20.0 |
|           | 2008 | 3  | R | 5.8  | 266.0 | 9.0  | 962.0  | 732.8 | 77.1 | 30.9 | 127.0 | 234.9 | 0.2 | 6.0  | 7.2  | 13.5 |
|           | 2008 | 4  | R | 5.1  | 284.5 | 8.9  | 1165.8 | 916.9 | 83.5 | 34.7 | 135.6 | 253.9 | 0.3 | 7.2  | 7.8  | 15.3 |
|           | 2008 | 5  | F | 4.6  | 327.1 | 7.7  | 866.5  | 570.7 | 99.7 | 45.6 | 155.6 | 300.9 | 0.4 | 12.6 | 10.4 | 23.4 |
|           | 2008 | 6  | C | 4.3  | 301.7 | 8.2  | 1174.3 | 906.8 | 89.8 | 38.7 | 143.7 | 272.3 | 0.3 | 9.3  | 9.0  | 18.6 |
|           | 2009 | 7  | F | 7.5  | 207.8 | 9.0  | 414.6  | 244.0 | 58.5 | 21.3 | 99.7  | 179.6 | 0.2 | 3.5  | 5.7  | 9.3  |

---

**Ecologically optimal N**

|         |      |    |   |      |       |      |       |       |      |      |       |       |     |     |     |     |
|---------|------|----|---|------|-------|------|-------|-------|------|------|-------|-------|-----|-----|-----|-----|
| Hebei   | 2008 | 1  | F | 9.4  | 47.3  | 9.6  | 43.8  | 10.3  | 16.3 | 5.0  | 24.6  | 45.9  | 0.1 | 0.7 | 1.3 | 2.1 |
|         | 2008 | 2  | F | 6.5  | 196.1 | 8.4  | 551.6 | 392.2 | 55.1 | 19.7 | 94.2  | 169.0 | 0.2 | 3.4 | 5.8 | 9.3 |
|         | 2008 | 3  | F | 8.1  | 154.5 | 9.1  | 252.3 | 131.3 | 43.3 | 14.8 | 74.8  | 132.9 | 0.1 | 2.1 | 4.2 | 6.4 |
|         | 2008 | 4  | F | 9.1  | 181.6 | 10.4 | 327.0 | 181.3 | 50.9 | 17.9 | 87.4  | 156.2 | 0.1 | 2.4 | 4.3 | 6.8 |
|         | 2009 | 5  | F | 6.7  | 175.6 | 8.0  | 340.7 | 200.5 | 49.2 | 17.2 | 84.7  | 151.0 | 0.2 | 2.9 | 5.4 | 8.5 |
|         | 2009 | 6  | F | 8.8  | 173.7 | 10.1 | 343.7 | 205.2 | 48.6 | 17.0 | 83.8  | 149.4 | 0.1 | 2.3 | 4.3 | 6.7 |
|         | 2009 | 7  | F | 8.0  | 196.2 | 9.7  | 467.2 | 307.9 | 55.1 | 19.8 | 94.3  | 169.1 | 0.2 | 2.9 | 5.0 | 8.0 |
|         | 2009 | 8  | F | 7.7  | 217.9 | 9.8  | 607.9 | 427.4 | 61.6 | 22.8 | 104.5 | 188.8 | 0.2 | 3.5 | 5.5 | 9.1 |
|         | 2009 | 9  | F | 7.5  | 214.6 | 9.7  | 633.3 | 456.1 | 60.6 | 22.3 | 102.9 | 185.8 | 0.2 | 3.5 | 5.5 | 9.1 |
|         | 2009 | 10 | F | 7.3  | 221.5 | 9.4  | 591.3 | 407.3 | 62.7 | 23.3 | 106.2 | 192.1 | 0.2 | 3.8 | 5.8 | 9.8 |
|         | 2009 | 11 | F | 7.1  | 213.6 | 9.4  | 650.8 | 474.5 | 60.3 | 22.1 | 102.4 | 184.8 | 0.2 | 3.5 | 5.6 | 9.3 |
| Jiaozuo | 2008 | 1  | F | 9.3  | 66.6  | 9.7  | 75.1  | 27.0  | 20.9 | 6.6  | 33.6  | 61.1  | 0.1 | 0.9 | 1.8 | 2.7 |
|         | 2008 | 2  | F | 9.7  | 151.1 | 10.7 | 261.8 | 143.8 | 42.4 | 14.4 | 73.2  | 130.0 | 0.1 | 1.7 | 3.5 | 5.3 |
|         | 2008 | 3  | F | 8.0  | 222.6 | 11.2 | 978.0 | 793.0 | 63.0 | 23.5 | 106.7 | 193.1 | 0.2 | 3.2 | 4.9 | 8.3 |
|         | 2008 | 4  | F | 10.8 | 130.3 | 11.7 | 231.2 | 130.8 | 36.9 | 12.3 | 63.4  | 112.6 | 0.1 | 1.3 | 2.8 | 4.2 |

---

|         |      |    |   |     |       |      |        |       |      |      |       |       |     |     |     |      |
|---------|------|----|---|-----|-------|------|--------|-------|------|------|-------|-------|-----|-----|-----|------|
|         | 2008 | 5  | F | 8.1 | 184.7 | 9.6  | 479.3  | 327.5 | 51.8 | 18.3 | 88.9  | 159.0 | 0.1 | 2.6 | 4.7 | 7.5  |
|         | 2008 | 6  | F | 7.7 | 206.7 | 10.0 | 677.2  | 508.4 | 58.2 | 21.2 | 99.2  | 178.6 | 0.2 | 3.1 | 5.1 | 8.3  |
|         | 2009 | 7  | F | 7.8 | 102.4 | 8.4  | 134.1  | 57.6  | 29.7 | 9.7  | 50.3  | 89.7  | 0.1 | 1.4 | 3.1 | 4.6  |
|         | 2009 | 8  | F | 8.3 | 53.5  | 8.5  | 53.9   | 15.8  | 17.8 | 5.5  | 27.5  | 50.8  | 0.1 | 0.9 | 1.7 | 2.6  |
|         | 2009 | 9  | F | 8.5 | 105.3 | 9.2  | 160.9  | 82.0  | 30.5 | 9.9  | 51.7  | 92.1  | 0.1 | 1.3 | 2.9 | 4.3  |
|         | 2009 | 10 | F | 7.1 | 161.8 | 8.5  | 379.0  | 251.3 | 45.3 | 15.6 | 78.2  | 139.1 | 0.1 | 2.4 | 4.7 | 7.3  |
|         | 2009 | 11 | C | 3.2 | 196.7 | 5.8  | 782.2  | 622.8 | 55.2 | 19.8 | 94.5  | 169.6 | 0.3 | 4.9 | 8.4 | 13.6 |
|         | 2009 | 12 | F | 3.4 | 205.0 | 6.6  | 1011.7 | 840.3 | 57.7 | 20.9 | 98.4  | 177.0 | 0.2 | 4.6 | 7.7 | 12.6 |
| Kaifeng | 2008 | 1  | F | 6.0 | 229.7 | 8.8  | 851.6  | 659.5 | 65.2 | 24.5 | 110.0 | 199.7 | 0.2 | 4.4 | 6.4 | 11.0 |
|         | 2008 | 2  | F | 7.9 | 163.7 | 9.2  | 343.9  | 217.2 | 45.9 | 15.8 | 79.1  | 140.8 | 0.1 | 2.3 | 4.4 | 6.8  |
|         | 2008 | 3  | F | 6.4 | 206.3 | 8.4  | 556.4  | 387.2 | 58.1 | 21.1 | 99.0  | 178.2 | 0.2 | 3.7 | 6.1 | 9.9  |
|         | 2008 | 4  | F | 7.7 | 147.6 | 8.7  | 252.1  | 137.2 | 41.5 | 14.1 | 71.5  | 127.0 | 0.1 | 2.1 | 4.2 | 6.4  |
|         | 2008 | 5  | F | 7.0 | 112.2 | 7.7  | 162.1  | 76.8  | 32.2 | 10.6 | 55.0  | 97.8  | 0.1 | 1.7 | 3.7 | 5.5  |
|         | 2008 | 6  | F | 7.3 | 120.8 | 8.2  | 215.1  | 122.6 | 34.4 | 11.4 | 59.0  | 104.8 | 0.1 | 1.7 | 3.7 | 5.5  |
|         | 2008 | 7  | R | 5.8 | 189.6 | 7.4  | 458.3  | 305.4 | 53.2 | 18.9 | 91.2  | 163.2 | 0.2 | 3.6 | 6.3 | 10.1 |
|         | 2009 | 8  | F | 8.4 | 85.6  | 8.9  | 105.4  | 41.7  | 25.5 | 8.2  | 42.5  | 76.2  | 0.1 | 1.1 | 2.5 | 3.7  |

|         |      |    |   |     |       |     |       |       |      |      |       |       |     |     |     |      |
|---------|------|----|---|-----|-------|-----|-------|-------|------|------|-------|-------|-----|-----|-----|------|
|         | 2009 | 9  | F | 7.2 | 157.6 | 8.4 | 342.4 | 218.4 | 44.2 | 15.1 | 76.2  | 135.5 | 0.1 | 2.3 | 4.6 | 7.1  |
|         | 2009 | 10 | F | 8.2 | 139.2 | 9.2 | 267.0 | 158.9 | 39.2 | 13.2 | 67.6  | 120.1 | 0.1 | 1.8 | 3.8 | 5.7  |
| Luoyang | 2008 | 1  | F | 7.5 | 220.1 | 9.4 | 550.8 | 368.2 | 62.2 | 23.1 | 105.5 | 190.8 | 0.2 | 3.7 | 5.7 | 9.6  |
|         | 2008 | 2  | C | 6.7 | 184.7 | 8.1 | 366.9 | 218.3 | 51.7 | 18.3 | 88.9  | 158.9 | 0.2 | 3.1 | 5.7 | 9.0  |
|         | 2008 | 3  | C | 6.9 | 192.3 | 8.4 | 410.9 | 255.1 | 53.9 | 19.3 | 92.5  | 165.7 | 0.2 | 3.2 | 5.6 | 9.0  |
|         | 2008 | 4  | F | 7.6 | 226.9 | 9.7 | 596.3 | 406.9 | 64.4 | 24.1 | 108.7 | 197.2 | 0.2 | 3.9 | 5.8 | 9.8  |
|         | 2008 | 5  | C | 5.2 | 170.3 | 6.4 | 318.2 | 182.8 | 47.7 | 16.6 | 82.2  | 146.5 | 0.2 | 3.5 | 6.6 | 10.3 |
|         | 2009 | 6  | C | 6.8 | 151.9 | 7.8 | 261.7 | 143.0 | 42.6 | 14.5 | 73.5  | 130.7 | 0.1 | 2.4 | 4.8 | 7.3  |
|         | 2009 | 7  | C | 5.5 | 121.5 | 6.2 | 173.7 | 81.2  | 34.6 | 11.5 | 59.3  | 105.4 | 0.2 | 2.2 | 4.9 | 7.3  |
|         | 2009 | 8  | C | 4.6 | 188.2 | 6.1 | 413.9 | 262.0 | 52.8 | 18.7 | 90.5  | 162.0 | 0.2 | 4.3 | 7.6 | 12.1 |
|         | 2009 | 9  | C | 7.0 | 169.9 | 8.4 | 362.9 | 228.0 | 47.6 | 16.5 | 82.0  | 146.1 | 0.2 | 2.6 | 5.0 | 7.8  |
|         | 2009 | 10 | C | 6.9 | 175.2 | 8.3 | 385.3 | 245.5 | 49.1 | 17.2 | 84.4  | 150.7 | 0.2 | 2.8 | 5.2 | 8.2  |
|         | 2009 | 11 | F | 5.6 | 131.8 | 6.5 | 217.5 | 116.3 | 37.3 | 12.5 | 64.1  | 113.9 | 0.2 | 2.4 | 5.1 | 7.6  |
|         | 2009 | 12 | C | 4.7 | 130.6 | 5.6 | 233.3 | 133.1 | 37.0 | 12.3 | 63.6  | 112.9 | 0.2 | 2.7 | 5.8 | 8.7  |
|         | 2009 | 13 | C | 7.9 | 111.3 | 8.8 | 225.7 | 140.0 | 32.0 | 10.5 | 54.5  | 97.0  | 0.1 | 1.4 | 3.2 | 4.8  |
|         | 2009 | 14 | C | 7.8 | 44.9  | 8.0 | 43.4  | 10.7  | 15.7 | 4.9  | 23.4  | 44.0  | 0.1 | 0.8 | 1.5 | 2.4  |



|              |      |    |   |     |       |      |       |       |      |      |       |       |     |     |     |      |
|--------------|------|----|---|-----|-------|------|-------|-------|------|------|-------|-------|-----|-----|-----|------|
|              | 2009 | 15 | C | 8.9 | 97.9  | 9.5  | 146.4 | 71.8  | 28.6 | 9.3  | 48.2  | 86.1  | 0.1 | 1.2 | 2.6 | 3.9  |
|              | 2009 | 16 | C | 7.8 | 111.9 | 8.7  | 225.3 | 139.1 | 32.1 | 10.5 | 54.8  | 97.5  | 0.1 | 1.5 | 3.2 | 4.8  |
|              | 2009 | 17 | R | 8.4 | 152.9 | 10.0 | 481.4 | 362.3 | 42.9 | 14.6 | 74.0  | 131.5 | 0.1 | 1.9 | 3.8 | 5.8  |
|              | 2009 | 18 | R | 8.6 | 53.8  | 8.9  | 58.6  | 19.4  | 17.8 | 5.6  | 27.6  | 51.0  | 0.1 | 0.8 | 1.6 | 2.5  |
| Nanyang      | 2009 | 1  | R | 6.3 | 139.8 | 7.2  | 243.0 | 134.8 | 39.4 | 13.3 | 67.9  | 120.5 | 0.1 | 2.3 | 4.8 | 7.2  |
|              | 2009 | 2  | R | 6.2 | 55.2  | 6.5  | 52.3  | 12.8  | 18.2 | 5.7  | 28.3  | 52.2  | 0.1 | 1.2 | 2.2 | 3.5  |
|              | 2009 | 3  | R | 5.4 | 203.8 | 7.3  | 524.1 | 357.3 | 57.3 | 20.8 | 97.9  | 176.0 | 0.2 | 4.1 | 6.9 | 11.2 |
| Pingdingshan | 2009 | 1  | C | 3.7 | 198.6 | 5.5  | 512.9 | 351.2 | 55.8 | 20.1 | 95.4  | 171.3 | 0.3 | 5.2 | 8.9 | 14.4 |
|              | 2009 | 2  | C | 3.8 | 200.4 | 5.7  | 533.1 | 369.6 | 56.3 | 20.3 | 96.3  | 172.9 | 0.3 | 5.2 | 8.7 | 14.1 |
|              | 2009 | 3  | F | 4.8 | 219.9 | 7.3  | 733.4 | 551.1 | 62.2 | 23.1 | 105.4 | 190.6 | 0.2 | 4.8 | 7.4 | 12.5 |
|              | 2009 | 4  | C | 3.2 | 182.2 | 4.7  | 405.3 | 259.0 | 51.0 | 18.0 | 87.7  | 156.8 | 0.3 | 5.3 | 9.7 | 15.3 |
| Shanmenxia   | 2009 | 1  | C | 4.5 | 206.0 | 6.4  | 554.8 | 386.0 | 58.0 | 21.1 | 98.9  | 177.9 | 0.2 | 4.8 | 7.9 | 13.0 |
|              | 2009 | 2  | R | 5.6 | 147.6 | 6.6  | 256.5 | 141.6 | 41.5 | 14.1 | 71.5  | 127.1 | 0.2 | 2.7 | 5.6 | 8.4  |
|              | 2009 | 3  | R | 4.3 | 206.9 | 6.2  | 559.2 | 389.5 | 58.2 | 21.2 | 99.3  | 178.7 | 0.3 | 5.0 | 8.2 | 13.5 |
|              | 2009 | 4  | C | 6.1 | 123.5 | 6.8  | 167.4 | 74.8  | 35.1 | 11.6 | 60.3  | 107.0 | 0.1 | 2.1 | 4.6 | 6.8  |
| Shangqiu     | 2009 | 1  | F | 6.8 | 201.0 | 8.4  | 434.7 | 270.6 | 56.5 | 20.4 | 96.5  | 173.4 | 0.2 | 3.5 | 5.9 | 9.6  |

|           |      |   |   |     |       |     |       |       |      |      |       |       |     |     |     |      |
|-----------|------|---|---|-----|-------|-----|-------|-------|------|------|-------|-------|-----|-----|-----|------|
|           | 2009 | 2 | F | 5.9 | 221.2 | 8.7 | 843.9 | 660.3 | 62.6 | 23.2 | 106.0 | 191.8 | 0.2 | 4.1 | 6.3 | 10.6 |
|           | 2009 | 3 | F | 6.7 | 240.0 | 8.9 | 640.3 | 437.8 | 68.5 | 26.2 | 114.8 | 209.5 | 0.2 | 4.8 | 6.6 | 11.6 |
|           | 2009 | 4 | F | 6.3 | 232.4 | 8.7 | 702.3 | 507.5 | 66.1 | 25.0 | 111.2 | 202.2 | 0.2 | 4.5 | 6.5 | 11.3 |
| Xinxiang  | 2008 | 1 | F | 6.8 | 87.8  | 7.3 | 111.8 | 47.1  | 26.1 | 8.4  | 43.6  | 78.0  | 0.1 | 1.4 | 3.1 | 4.6  |
|           | 2008 | 2 | F | 6.4 | 272.0 | 9.0 | 738.6 | 503.1 | 79.1 | 32.1 | 129.8 | 241.0 | 0.3 | 6.4 | 7.4 | 14.0 |
|           | 2009 | 3 | C | 5.6 | 211.6 | 7.1 | 371.4 | 197.1 | 59.7 | 21.9 | 101.5 | 183.1 | 0.2 | 4.6 | 7.3 | 12.2 |
|           | 2009 | 4 | F | 7.1 | 226.6 | 9.1 | 548.6 | 359.5 | 64.3 | 24.1 | 108.5 | 196.9 | 0.2 | 4.1 | 6.1 | 10.4 |
|           | 2009 | 5 | C | 7.7 | 189.8 | 9.2 | 423.5 | 270.1 | 53.2 | 18.9 | 91.3  | 163.4 | 0.2 | 2.9 | 5.1 | 8.1  |
| Zhengzhou | 2009 | 1 | C | 6.1 | 181.2 | 7.5 | 381.6 | 236.3 | 50.7 | 17.9 | 87.2  | 155.9 | 0.2 | 3.3 | 5.9 | 9.4  |
|           | 2009 | 2 | C | 6.1 | 89.4  | 6.5 | 100.4 | 34.4  | 26.5 | 8.5  | 44.3  | 79.3  | 0.1 | 1.6 | 3.5 | 5.2  |
|           | 2009 | 3 | C | 6.1 | 182.3 | 7.5 | 375.6 | 229.2 | 51.1 | 18.0 | 87.8  | 156.8 | 0.2 | 3.3 | 6.0 | 9.5  |
| Zhoukou   | 2008 | 1 | F | 6.8 | 149.0 | 8.5 | 493.3 | 373.0 | 41.9 | 14.2 | 72.2  | 128.3 | 0.1 | 2.1 | 4.4 | 6.6  |
|           | 2008 | 2 | F | 6.3 | 234.0 | 8.9 | 777.0 | 580.6 | 66.6 | 25.2 | 112.0 | 203.8 | 0.2 | 4.5 | 6.5 | 11.2 |
|           | 2008 | 3 | F | 6.0 | 243.6 | 9.1 | 947.9 | 741.8 | 69.6 | 26.8 | 116.5 | 212.9 | 0.2 | 4.8 | 6.6 | 11.6 |
|           | 2008 | 4 | F | 6.8 | 195.1 | 8.4 | 440.2 | 281.8 | 54.8 | 19.6 | 93.8  | 168.2 | 0.2 | 3.3 | 5.7 | 9.2  |
|           | 2008 | 5 | F | 7.5 | 90.3  | 7.9 | 100.9 | 34.2  | 26.7 | 8.6  | 44.7  | 80.0  | 0.1 | 1.3 | 2.9 | 4.3  |

---

|           |      |    |   |      |       |      |        |       |      |      |       |       |     |     |     |      |
|-----------|------|----|---|------|-------|------|--------|-------|------|------|-------|-------|-----|-----|-----|------|
|           | 2009 | 6  | F | 4.6  | 205.2 | 6.6  | 559.8  | 391.7 | 57.7 | 21.0 | 98.5  | 177.2 | 0.2 | 4.7 | 7.7 | 12.5 |
|           | 2009 | 7  | F | 4.1  | 218.7 | 6.2  | 592.6  | 411.4 | 61.8 | 22.9 | 104.8 | 189.5 | 0.3 | 5.6 | 8.7 | 14.5 |
|           | 2009 | 8  | F | 4.4  | 214.0 | 6.4  | 552.1  | 375.5 | 60.4 | 22.2 | 102.6 | 185.2 | 0.3 | 5.2 | 8.3 | 13.8 |
|           | 2009 | 9  | F | 4.2  | 235.0 | 6.9  | 793.8  | 596.4 | 66.9 | 25.4 | 112.4 | 204.7 | 0.3 | 5.9 | 8.3 | 14.5 |
|           | 2009 | 10 | F | 8.6  | 138.6 | 9.4  | 176.1  | 69.1  | 39.1 | 13.1 | 67.3  | 119.5 | 0.1 | 1.7 | 3.7 | 5.5  |
| Zhumadian | 2008 | 1  | F | 10.3 | 54.9  | 10.6 | 51.5   | 13.8  | 18.1 | 5.7  | 28.1  | 51.9  | 0.1 | 0.7 | 1.4 | 2.1  |
|           | 2008 | 2  | R | 3.6  | 263.4 | 7.5  | 1225.6 | 999.1 | 76.2 | 30.4 | 125.8 | 232.3 | 0.3 | 7.1 | 8.6 | 16.0 |
|           | 2008 | 3  | R | 5.8  | 229.3 | 8.9  | 943.8  | 752.0 | 65.1 | 24.5 | 109.8 | 199.4 | 0.2 | 4.3 | 6.3 | 10.8 |
|           | 2008 | 4  | R | 5.1  | 249.0 | 8.8  | 1147.6 | 936.0 | 71.4 | 27.7 | 119.0 | 218.1 | 0.2 | 5.3 | 6.9 | 12.4 |
|           | 2008 | 5  | F | 4.6  | 262.7 | 7.5  | 832.9  | 607.2 | 75.9 | 30.2 | 125.4 | 231.6 | 0.3 | 7.1 | 8.6 | 16.0 |
|           | 2008 | 6  | C | 4.3  | 261.4 | 8.1  | 1153.3 | 929.0 | 75.5 | 30.0 | 124.8 | 230.3 | 0.3 | 6.4 | 7.9 | 14.6 |
|           | 2009 | 7  | F | 7.5  | 160.9 | 8.9  | 393.5  | 266.7 | 45.1 | 15.5 | 77.8  | 138.4 | 0.1 | 2.3 | 4.5 | 6.9  |

---

**Table 3.** Economically and ecologically optimal N rate (kg N ha<sup>-1</sup>), yield (Mg ha<sup>-1</sup>), reactive N losses (Nr, kg N ha<sup>-1</sup>) economic benefit (EB, \$ ha<sup>-1</sup>) and net benefit (NB, \$ ha<sup>-1</sup>) with different prices of maize, N fertilizer and equivalent cost of CO<sub>2</sub>, PO<sub>4</sub> and SO<sub>2</sub>. Data in bracket means the price levels used in this study, and the other two were the lowest and highest prices in 10 years for maize and N fertilizer, and were 75% and 125% of the used price for CO<sub>2</sub>, PO<sub>4</sub> and SO<sub>2</sub>. With site 2 in Hebei, for example.

|                            | Price<br>\$ t <sup>-1</sup> | Economically optimal |       |     |     |     | Ecologically optimal |       |    |     |     |
|----------------------------|-----------------------------|----------------------|-------|-----|-----|-----|----------------------|-------|----|-----|-----|
|                            |                             | N rate               | Yield | Nr  | EB  | NB  | N rate               | Yield | Nr | EB  | NB  |
| Maize                      | 245                         | 228                  | 8529  | 96  | 337 | 147 | 159                  | 8199  | 60 | 306 | 182 |
|                            | (360)                       | 246                  | 8574  | 107 | 575 | 367 | 196                  | 8409  | 78 | 552 | 392 |
|                            | 409                         | 250                  | 8583  | 110 | 678 | 464 | 206                  | 8452  | 83 | 656 | 487 |
| N fertilizer               | 551                         | 254                  | 8589  | 113 | 615 | 398 | 204                  | 8443  | 82 | 591 | 424 |
|                            | (710)                       | 246                  | 8574  | 107 | 575 | 367 | 196                  | 8409  | 78 | 552 | 392 |
|                            | 870                         | 238                  | 8556  | 102 | 537 | 337 | 188                  | 8371  | 74 | 513 | 361 |
| CO <sub>2</sub> equivalent | 17.9                        | 246                  | 8574  | 107 | 575 | 383 | 200                  | 8427  | 80 | 555 | 404 |
|                            | (23.8)                      | 246                  | 8574  | 107 | 575 | 367 | 196                  | 8409  | 78 | 552 | 392 |
|                            | 29.8                        | 246                  | 8574  | 107 | 575 | 351 | 192                  | 8391  | 76 | 548 | 381 |
| PO <sub>4</sub> equivalent | 466                         | 246                  | 8574  | 107 | 575 | 376 | 199                  | 8420  | 79 | 554 | 398 |
|                            | (621)                       | 246                  | 8574  | 107 | 575 | 367 | 196                  | 8409  | 78 | 552 | 392 |
|                            | 776                         | 246                  | 8574  | 107 | 575 | 364 | 196                  | 8406  | 78 | 551 | 390 |
| SO <sub>2</sub> equivalent | 613                         | 246                  | 8574  | 107 | 575 | 396 | 202                  | 8435  | 81 | 557 | 416 |
|                            | (817)                       | 246                  | 8574  | 107 | 575 | 367 | 196                  | 8409  | 78 | 552 | 392 |
|                            | 1021                        | 246                  | 8574  | 107 | 575 | 338 | 190                  | 8381  | 75 | 546 | 370 |
